# Supplementary material for: Profound phenotypic and epigenetic heterogeneity of the HIV-1-infected CD4+ T cell reservoir
Source: PubMed Central journal article supplement (PMC9892009; doi:10.1038/s41590-022-01371-3), 2022-12-19
Supplement: 41590_2022_1371_MOESM1_ESM.pdf [file 41590_2022_1371_MOESM1_ESM.pdf]

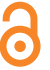

# Profound phenotypic and epigenetic heterogeneity of the HIV-1-infected CD4<sup>+</sup> T cell reservoir

In the format provided by the authors and unedited

**Supplemental Table 1:** Catalog of TotalSeqA antibodies used for study.

| DNA_ID | Description                        | Clone    | Barcode          |
|--------|------------------------------------|----------|------------------|
| A0006  | CD86                               | IT2.2    | GTCTTTGTCAAGTGCA |
| A0007  | CD274 (B7-H1, PD-L1)               | 29E.2A3  | GTTGTCCGACAATAC  |
| A0020  | CD270 (HVEM, TR2)                  | 122      | TGATAGAAACAGACC  |
| A0023  | CD155 (PVR)                        | SKII.4   | ATCACATCGTTGCCA  |
| A0024  | CD112 (Nectin-2)                   | TX31     | AACCTTCCGTCTAAG  |
| A0026  | CD47                               | CC2C6    | GCATTCTGTCACCTA  |
| A0029  | CD48                               | BJ40     | CTACGACGTAGAAGA  |
| A0031  | CD40                               | 5C3      | CTCAGATGGAGTATG  |
| A0032  | CD154                              | 24-31    | GCTAGATAGATGCAA  |
| A0033  | CD52                               | HI186    | CTTTGTACGAGCAAA  |
| A0034  | CD3                                | UCHT1    | CTCATTGTAACCTCT  |
| A0046  | CD8                                | SK1      | GCGCAACTTGATGAT  |
| A0047  | CD56 (NCAM)                        | 5.1H11   | TCCTTTCCCTGATAGG |
| A0050  | CD19                               | HIB19    | CTGGGCAATTACTCG  |
| A0052  | CD33                               | P67.6    | TAACCTCAGGGCCTAT |
| A0053  | CD11c                              | S-HCL-3  | TACGCCATATAACTTG |
| A0058  | HLA-A,B,C                          | W6/32    | TATGCGAGGCTTATC  |
| A0063  | CD45RA                             | HI100    | TCAATCCTTCCGCTT  |
| A0064  | CD123                              | 6H6      | CTTCACTCTGTCAGG  |
| A0066  | CD7                                | CD7-6B7  | TGGATTCCCGGACTT  |
| A0070  | CD49f                              | GoH3     | TTCCGAGGATGATCT  |
| A0071  | CD194 (CCR4)                       | L291H4   | AGCTTACCTGCACGA  |
| A0072  | CD4                                | RPA-T4   | TGTTCCCGCTCAACT  |
| A0073  | CD44                               | IM7      | TGGCTTCAGGTCCTA  |
| A0081  | CD14                               | M5E2     | TCTCAGACCTCCGTA  |
| A0083  | CD16                               | 3G8      | AAGTTCACTCTTTGC  |
| A0085  | CD25                               | BC96     | TTTGTCTGTACGCC   |
| A0087  | CD45RO                             | UCHL1    | CTCCGAATCATGTTG  |
| A0088  | CD279 (PD-1)                       | EH12.2H7 | ACAGCGCCGTATTTA  |
| A0089  | TIGIT (VSTM3)                      | A15153G  | TTGCTTACCGCCAGA  |
| A0090  | Mouse IgG1, $\kappa$ isotype Ctrl  | MOPC-21  | GCCGGACGACATTA   |
| A0091  | Mouse IgG2a, $\kappa$ isotype Ctrl | MOPC-173 | CTCCTACCTAAACTG  |
| A0092  | Mouse IgG2b, $\kappa$ isotype Ctrl | MPC-11   | ATATGTATCACGCGA  |
| A0095  | Rat IgG2b, $\kappa$ Isotype Ctrl   | RTK4530  | GATTCTTGACGACCT  |
| A0100  | CD20                               | 2H7      | TTCTGGGTCCCTAGA  |
| A0101  | CD335 (NKp46)                      | 9E2      | ACAATTTGAACAGCG  |
| A0124  | CD31                               | WM59     | ACCTTTATGCCACGG  |
| A0127  | Podoplanin                         | NC-08    | GGTTACTCGTTGTGT  |
| A0134  | CD146                              | P1H12    | CCTTGGATAACATCA  |
| A0136  | IgM                                | MHM-88   | TAGCGAGCCCGTATA  |
| A0138  | CD5                                | UCHT2    | CATTAACGGGATGCC  |
| A0140  | CD183 (CXCR3)                      | G025H7   | GCGATGGTAGATTAT  |
| A0141  | CD195 (CCR5)                       | J418F1   | CCAAAGTAAGAGCCA  |
| A0142  | CD32                               | FUN-2    | GCTTCCGAATTACCG  |
| A0143  | CD196 (CCR6)                       | G034E3   | GATCCCTTTGTCACT  |
| A0144  | CD185 (CXCR5)                      | J252D4   | AATTCAACCGTCGCC  |
| A0145  | CD103 (Integrin $\alpha$ E)        | Ber-ACT8 | GACCTCATTGTGAAT  |
| A0146  | CD69                               | FN50     | GTCTCTTGGCTTAAA  |
| A0147  | CD62L                              | DREG-56  | GTCCCTGCAACTTGA  |
| A0149  | CD161                              | HP-3G10  | GTACGCAGTCCTTCT  |
| A0151  | CD152 (CTLA-4)                     | BNI3     | ATGGTTACGTAATC   |
| A0152  | CD223 (LAG-3)                      | 11C3C65  | CATTTGTCTGCCGGT  |

(continued)

| DNA_ID | Description                            | Clone             | Barcode           |
|--------|----------------------------------------|-------------------|-------------------|
| A0153  | KLRG1 (MAFA)                           | SA231A2           | CTTATTTCTGCCCT    |
| A0154  | CD27                                   | O323              | GCACTCCTGCATGTA   |
| A0155  | CD107a (LAMP-1)                        | H4A3              | CAGCCCACTGCAATA   |
| A0156  | CD95 (Fas)                             | DX2               | CCAGCTCATTAGAGC   |
| A0158  | CD134 (OX40)                           | Ber-ACT35 (ACT35) | AACCCACCGTTGTTA   |
| A0159  | HLA-DR                                 | L243              | AATAGCGAGCAAGTA   |
| A0160  | CD1c                                   | L161              | GAGCTACTTCACTCG   |
| A0161  | CD11b                                  | ICRF44            | GACAAGTGATCTGCA   |
| A0162  | CD64                                   | 10.1              | AAGTATGCCCTACGA   |
| A0163  | CD141 (Thrombomodulin)                 | M80               | GGATAACCGCGCTTT   |
| A0165  | CD314 (NKG2D)                          | 1D11              | CGTGTGTTGTTCCCTCA |
| A0167  | CD35                                   | E11               | ACTTCCGTCGATCTT   |
| A0168  | CD57                                   | QA17A04           | AACTCCCTATGGAGG   |
| A0170  | CD272 (BTLA)                           | MIH26             | GTTATTGGACTAAGG   |
| A0171  | CD278 (ICOS)                           | C398.4A           | CGCGCACCCATTAATA  |
| A0172  | CD275 (B7-H2, B7-RP1, ICOSL)           | 9F.8A4            | GTTAGTGTAGCTTG    |
| A0174  | CD58 (LFA-3)                           | TS2/9             | GTTCCCTATGGACGAC  |
| A0176  | CD39                                   | A1                | TTACCTGGTATCCGT   |
| A0179  | CX3CR1                                 | K0124E1           | AGTATCGTCTCTGGG   |
| A0180  | CD24                                   | ML5               | AGATTCCTTCGTGTT   |
| A0181  | CD21                                   | Bu32              | AACCTAGTAGTTCGG   |
| A0185  | CD11a                                  | TS2/4             | TATATCCTTGTGAGC   |
| A0187  | CD79b (Ig $\beta$ )                    | CB3-1             | ATTCTTCAACCGAAG   |
| A0189  | CD244 (2B4)                            | C1.7              | TCGCTTGATGGTAG    |
| A0206  | CD169 (Sialoadhesin, Siglec-1)         | 7-239             | TACTCAGCGTGTGTTG  |
| A0214  | integrin $\beta$ 7                     | FIB504            | TCCTTGATGTACCG    |
| A0215  | CD268 (BAFF-R)                         | 11C1              | CGAAGTCGATCCGTA   |
| A0216  | CD42b                                  | HIP1              | TCCTAGTACCGAAGT   |
| A0217  | CD54                                   | HA58              | CTGATAGACTTGAGT   |
| A0218  | CD62P (P-Selectin)                     | AK4               | CCTTCCGTATCCCTT   |
| A0219  | CD119 (IFN- $\gamma$ R $\alpha$ chain) | GIR-208           | TGTGTATTCCCTTGT   |
| A0224  | TCR $\alpha/\beta$                     | IP26              | CGTAACGTAGAGCGA   |
| A0236  | Rat IgG1, $\kappa$ isotype Ctrl        | RTK2071           | ATCAGATGCCCTCAT   |
| A0237  | Rat IgG1, $\lambda$ Isotype Ctrl       | G0114F7           | GGGAGCGATTCAACT   |
| A0238  | Rat IgG2a, $\kappa$ Isotype Ctrl       | RTK2758           | AAGTCAGGTTTCGTTT  |
| A0240  | Rat IgG2c, $\kappa$ Isotype Ctrl       | RTK4174           | TCCAGGCTAGTCATT   |
| A0241  | Armenian Hamster IgG Isotype Ctrl      | HTK888            | CCTGTCATTAAGACT   |
| A0242  | CD192 (CCR2)                           | K036C2            | GAGTTCCTTACCTG    |
| A0246  | CD122 (IL-2R $\beta$ )                 | TU27              | TCATTTCTCCGATT    |
| A0247  | CD267 (TACI)                           | 1A1               | AGTGATGGAGCGAAC   |
| A0352  | Fc $\epsilon$ R1 $\alpha$              | AER-37 (CRA-1)    | CTCGTTTCCGTATCG   |
| A0353  | CD41                                   | HIP8              | ACGTTGTGGCCTTGT   |
| A0355  | CD137 (4-1BB)                          | 4B4-1             | CAGTAAGTTCGGGAC   |
| A0357  | CD43                                   | CD43-10G7         | GATTAACCAGCTCAT   |
| A0358  | CD163                                  | GHI/61            | GCTTCTCCTTCCCTTA  |
| A0359  | CD83                                   | HB15e             | CCACTCATTTCGGGT   |
| A0364  | CD13                                   | WM15              | TTTCAACGCCCTTTC   |
| A0367  | CD2                                    | TS1/8             | TACGATTTGTCAGGG   |
| A0368  | CD226 (DNAM-1)                         | 11A8              | TCTCAGTGTGTTGTGG  |
| A0369  | CD29                                   | TS2/16            | GTATTCCTCAGTCA    |
| A0370  | CD303 (BDCA-2)                         | 201A              | GAGATGTCCGAATTT   |
| A0371  | CD49b                                  | P1E6-C5           | GCTTTCTTCAGTATG   |
| A0372  | CD61                                   | VI-PL2            | AGGTTGGAGTAGACT   |

(continued)

| DNA_ID | Description                 | Clone     | Barcode         |
|--------|-----------------------------|-----------|-----------------|
| A0373  | CD81 (TAPA-1)               | 5A6       | GTATCCTTCCTTGGC |
| A0383  | CD55                        | JS11      | GCTCATTACCCATTA |
| A0384  | IgD                         | IA6-2     | CAGTCTCCGTAGAGT |
| A0385  | CD18                        | TS1/18    | TATTGGGACACTTCT |
| A0386  | CD28                        | CD28.2    | TGAGAACGACCCTAA |
| A0389  | CD38                        | HIT2      | TGTACCCGCTTGTGA |
| A0390  | CD127 (IL-7R $\alpha$ )     | A019D5    | GTGTGTTGTCTTATG |
| A0391  | CD45                        | HI30      | TGCAATTACCCGGAT |
| A0393  | CD22                        | S-HCL-1   | GGGTTGTTGTCTTTG |
| A0394  | CD71                        | CY1G4     | CCGTGTTCTCATTAA |
| A0396  | CD26                        | BA5b      | GGTGGCTAGATAATG |
| A0398  | CD115 (CSF-1R)              | 9-4D2-1E4 | AATCACGGTCCTTGT |
| A0404  | CD63                        | H5C6      | GAGATGTCTGCAACT |
| A0406  | CD304 (Neuropilin-1)        | 12C2      | GGACTAAGTTTCGTT |
| A0407  | CD36                        | 5-271     | TTCTTTGCCTTGCCA |
| A0408  | CD172a (SIRP $\alpha$ )     | 15-414    | CGTGTTAACTTGAG  |
| A0419  | CD72                        | 3F3       | CAGTCGTGGTAGATA |
| A0420  | CD158 (KIR2DL1/S1/S3/S5)    | HP-MA4    | TATCAACCAACGCTT |
| A0446  | CD93                        | VIMD2     | GCGCTACTTCCTTGA |
| A0447  | CD200 (OX2)                 | OX-104    | CACGTAGACCTTGC  |
| A0575  | CD49a                       | TS2/7     | ACTGATGGACTCAGA |
| A0576  | CD49d                       | 9F10      | CCATTCAACTCCGG  |
| A0577  | CD73 (Ecto-5'-nucleotidase) | AD2       | CAGTTCCTCAGTTCG |
| A0579  | CD9                         | HI9a      | GAGTACCAATCTGC  |
| A0581  | TCR Va7.2                   | 3C10      | TACGAGCAGATTCA  |
| A0582  | TCR V $\beta$ 2             | B6        | TCAGTCAGATGGTAT |
| A0586  | CD354 (TREM-1)              | TREM-26   | TAGCCGTTTCCTTTG |
| A0590  | CD305 (LAIR1)               | NKTA255   | ATTTCCATTCCCTGT |
| A0591  | LOX-1                       | 15C4      | ACCCTTTACCGAATA |
| A0599  | CD158e1 (KIR3DL1, NKB1)     | DX9       | GGACGCTTTCCTTGA |
| A0817  | CD109                       | W7C5      | CACTTAACTCTGGGT |
| A0822  | CD142                       | NY2       | CACTGCCGTCGATTA |
| A0830  | CD319 (CRACC)               | 162.1     | AGTATGCCATGTCTT |
| A0845  | CD99                        | 3B2/TA8   | ACCCGTCCTAAGAA  |
| A0853  | CLEC12A                     | 50C1      | CATTAGAGTCTGCCA |
| A0861  | CD151 (PETA-3)              | 50-6      | CTTACCTAGTCATTC |
| A0864  | CD352 (NTB-A)               | NT-7      | AGTTTCCACTCAGGC |
| A0866  | CLEC1B (CLEC2)              | AYP1      | TGCCAGTATCACGTA |
| A0867  | CD94                        | DX22      | CTTTCCGGTCTTACA |
| A0868  | IgE                         | MHE-18    | GGATGTACCCGCTAT |
| A0870  | CD150 (SLAM)                | A12 (7D4) | GTCATTGTATGTCTG |
| A0871  | CD162                       | KPL-1     | ATATGTCAGAGCACC |
| A0872  | CD84                        | CD84.1.21 | CTCCCTAGTTCTTTT |
| A0894  | Ig light chain $\kappa$     | MHK-49    | AGCTCAGCCAGTATG |
| A0896  | CD85j (ILT2)                | GHI/75    | CCTTGTGAGGCTATG |
| A0897  | CD23                        | EBVCS-5   | TCTGTATAACCGTCT |
| A0898  | Ig light chain $\lambda$    | MHL-38    | CAGCCAGTAAGTCAC |
| A0902  | CD328 (Siglec-7)            | 6-434     | CTTAGCATTTCACTG |
| A0912  | GPR56                       | CG4       | GCCTAGTTTCCGTTT |
| A0920  | CD82                        | ASL-24    | TCCCACTTCCGCTTT |
| A0923  | NKp80                       | 5D12      | TATAGTTCCTCTGTG |
| A0931  | CD131                       | 1C1       | CTGCATGAGACCAAA |

(continued)

| DNA_ID | Description    | Clone  | Barcode         |
|--------|----------------|--------|-----------------|
| A0935  | CD74           | LN2    | CTGTAGCATTTCCT  |
| A0940  | CD116          | 4H1    | ATGGACAGTTCGTGT |
| A0941  | CD37           | M-B371 | ACAGTCACTGGGCAA |
| A0944  | CD101 (BB27)   | BB27   | CTACTTCCCTGTCAA |
| A1018  | HLA-DR, DP, DQ | Tü39   | AGCTACGAGCAGTAG |
| A1046  | CD88 (C5aR)    | S5/1   | GCCGCATGAGAAACA |

**Supplemental Table 2:** Significant surface markers enriched in each cluster (over all other cells) for *in vitro* model. Significance calculated in Seurat using two-sided Wilcoxon test with multiple comparison adjustment using Bonferroni-Hochberg method.

| Cluster | Marker                      | log2(fold change) | Adjusted p value | t-score |
|---------|-----------------------------|-------------------|------------------|---------|
| C1      | CD22                        | 1.40              | 2.0e-215         | 301.34  |
| C1      | CD72                        | 1.52              | 1.0e-198         | 300.64  |
| C1      | CD20                        | 1.26              | 2.5e-218         | 273.94  |
| C1      | CD40                        | 1.17              | 6.4e-226         | 263.86  |
| C1      | HLA-DR                      | 1.20              | 2.2e-217         | 259.29  |
| C1      | CD19                        | 1.18              | 5.6e-217         | 255.89  |
| C1      | CD32                        | 1.14              | 5.3e-215         | 245.08  |
| C1      | HLA-DR, DP, DQ              | 1.16              | 4.1e-212         | 244.45  |
| C1      | CD21                        | 0.95              | 1.3e-240         | 227.59  |
| C1      | CD86                        | 1.01              | 9.1e-209         | 210.48  |
| C1      | CD71                        | 0.96              | 1.0e-204         | 196.72  |
| C1      | CD35                        | 1.06              | 3.0e-155         | 164.48  |
| C1      | IgD                         | 1.26              | 3.2e-128         | 161.24  |
| C1      | CD85j (ILT2)                | 0.78              | 2.2e-197         | 153.44  |
| C1      | CD39                        | 0.75              | 1.9e-201         | 150.80  |
| C1      | CD185 (CXCR5)               | 0.66              | 1.7e-211         | 138.28  |
| C1      | CD63                        | 0.64              | 1.2e-167         | 106.64  |
| C1      | CD150 (SLAM)                | 0.71              | 4.8e-145         | 103.18  |
| C1      | CD54                        | 0.59              | 4.7e-174         | 101.59  |
| C1      | CD267 (TACI)                | 0.62              | 1.0e-151         | 93.58   |
| C1      | CD79b (Igβ)                 | 0.57              | 7.7e-140         | 79.30   |
| C1      | CD82                        | 0.36              | 2.2e-160         | 57.26   |
| C1      | CD119 (IFN-γ R α chain)     | 0.47              | 7.4e-116         | 53.72   |
| C1      | CD74                        | 0.35              | 9.3e-144         | 50.56   |
| C1      | CD45RA                      | 0.38              | 4.6e-114         | 42.61   |
| C1      | CD196 (CCR6)                | 0.43              | 4.0e-92          | 38.88   |
| C1      | CD123                       | 0.43              | 1.2e-88          | 37.49   |
| C1      | CD73 (Ecto-5'-nucleotidase) | 0.46              | 1.5e-80          | 36.40   |
| C1      | CD37                        | 0.30              | 5.2e-102         | 30.09   |
| C1      | CD58 (LFA-3)                | 0.32              | 2.0e-79          | 25.23   |
| C1      | CD1c                        | 0.29              | 2.2e-82          | 24.08   |
| C1      | CD69                        | 0.34              | 3.5e-69          | 23.37   |
| C1      | CD319 (CRACC)               | 0.31              | 2.7e-71          | 21.63   |
| C1      | IgM                         | 0.28              | 5.0e-62          | 17.24   |
| C1      | CD183 (CXCR3)               | 0.29              | 2.4e-56          | 16.31   |
| C1      | CD272 (BTLA)                | 0.26              | 6.5e-51          | 12.80   |
| C1      | CD83                        | 0.29              | 6.2e-37          | 10.57   |
| C10     | CD244 (2B4)                 | 1.05              | 4.6e-218         | 227.73  |
| C10     | KLRG1 (MAFA)                | 1.11              | 6.4e-173         | 190.52  |
| C10     | CD57                        | 1.23              | 7.3e-134         | 163.63  |
| C10     | GPR56                       | 0.84              | 4.6e-170         | 142.86  |
| C10     | CD195 (CCR5)                | 0.90              | 3.1e-145         | 129.71  |
| C10     | CD49a                       | 0.94              | 3.3e-130         | 121.32  |
| C10     | HLA-DR, DP, DQ              | 0.62              | 1.9e-111         | 69.05   |
| C10     | CD29                        | 0.43              | 6.2e-136         | 58.01   |
| C10     | HLA-DR                      | 0.52              | 2.2e-101         | 52.16   |
| C10     | CD319 (CRACC)               | 0.37              | 3.8e-97          | 36.04   |
| C10     | CD18                        | 0.27              | 3.4e-98          | 26.36   |
| C10     | CD49d                       | 0.29              | 1.2e-86          | 25.06   |
| C10     | CD279 (PD-1)                | 0.40              | 5.7e-59          | 23.28   |
| C10     | CD151 (PETA-3)              | 0.34              | 4.3e-57          | 19.10   |
| C10     | CD226 (DNAM-1)              | 0.25              | 9.8e-57          | 14.24   |
| C10     | TIGIT (VSTM3)               | 0.39              | 2.0e-33          | 12.80   |
| C10     | CD223 (LAG-3)               | 0.31              | 1.7e-33          | 10.21   |

(continued)

| Cluster | Marker                       | log2(fold change) | Adjusted p value | $\pi$ -score |
|---------|------------------------------|-------------------|------------------|--------------|
| C2      | CD112 (Nectin-2)             | 0.50              | 1.4e-23          | 11.48        |
| C2      | CD74                         | 0.42              | 1.6e-26          | 10.75        |
| C2      | CX3CR1                       | 0.44              | 7.8e-22          | 9.19         |
| C2      | CD79b (Ig $\beta$ )          | 0.43              | 1.9e-20          | 8.46         |
| C2      | CD23                         | 0.40              | 6.8e-20          | 7.70         |
| C2      | LOX-1                        | 0.37              | 1.0e-18          | 6.73         |
| C2      | CD134 (OX40)                 | 0.39              | 1.6e-16          | 6.23         |
| C2      | CD116                        | 0.28              | 3.0e-21          | 5.65         |
| C2      | CD24                         | 0.32              | 5.1e-18          | 5.47         |
| C2      | CD303 (BDCA-2)               | 0.29              | 3.8e-16          | 4.55         |
| C2      | CD314 (NKG2D)                | 0.26              | 8.6e-17          | 4.15         |
| C2      | CD83                         | 0.30              | 2.2e-12          | 3.54         |
| C2      | IgE                          | 0.27              | 2.9e-13          | 3.42         |
| C2      | CD163                        | 0.31              | 1.8e-09          | 2.75         |
| C2      | CD141 (Thrombomodulin)       | 0.28              | 1.5e-09          | 2.43         |
| C2      | CD275 (B7-H2, B7-RP1, ICOSL) | 0.25              | 3.4e-10          | 2.38         |
| C2      | CD123                        | 0.29              | 7.1e-04          | 0.90         |
| C3      | TIGIT (VSTM3)                | 0.79              | 3.6e-61          | 47.92        |
| C3      | CD25                         | 0.79              | 2.5e-57          | 44.44        |
| C3      | CD95 (Fas)                   | 0.27              | 2.8e-43          | 11.58        |
| C3      | CD49f                        | 0.37              | 2.7e-25          | 9.16         |
| C3      | CD194 (CCR4)                 | 0.32              | 1.2e-20          | 6.34         |
| C4      | CD49b                        | 0.61              | 5.9e-159         | 96.86        |
| C4      | CD195 (CCR5)                 | 0.56              | 7.3e-136         | 76.22        |
| C4      | CD161                        | 0.69              | 8.3e-108         | 73.66        |
| C4      | CD150 (SLAM)                 | 0.41              | 1.7e-141         | 57.48        |
| C4      | CD194 (CCR4)                 | 0.36              | 4.8e-96          | 34.56        |
| C4      | CD49a                        | 0.42              | 2.8e-81          | 33.52        |
| C4      | CD226 (DNAM-1)               | 0.26              | 4.2e-126         | 32.90        |
| C4      | CD25                         | 0.33              | 1.2e-96          | 31.57        |
| C4      | CD58 (LFA-3)                 | 0.26              | 8.3e-119         | 31.27        |
| C4      | CD279 (PD-1)                 | 0.30              | 8.3e-93          | 27.92        |
| C4      | CD151 (PETA-3)               | 0.26              | 4.9e-74          | 19.24        |
| C4      | CD69                         | 0.39              | 2.2e-46          | 17.62        |
| C5      | CD49b                        | 0.56              | 5.3e-182         | 102.14       |
| C5      | CD194 (CCR4)                 | 0.42              | 1.1e-163         | 67.84        |
| C5      | CD161                        | 0.56              | 7.0e-92          | 51.28        |
| C5      | CD29                         | 0.27              | 7.6e-187         | 50.77        |
| C5      | CD226 (DNAM-1)               | 0.26              | 2.7e-192         | 50.35        |
| C5      | CD58 (LFA-3)                 | 0.27              | 1.9e-173         | 47.04        |
| C5      | CD150 (SLAM)                 | 0.32              | 2.3e-145         | 46.34        |
| C5      | CD195 (CCR5)                 | 0.42              | 1.1e-96          | 40.04        |
| C5      | CD49a                        | 0.33              | 1.6e-79          | 26.33        |
| C6      | CD55                         | 0.44              | 0.0e+00          | Inf          |
| C6      | CD45RA                       | 0.25              | 6.5e-248         | 62.04        |
| C7      | CD38                         | 0.33              | 1.8e-177         | 58.69        |
| C7      | CD7                          | 0.27              | 4.0e-112         | 30.17        |
| C7      | CD31                         | 0.32              | 5.0e-59          | 18.57        |
| C8      | CD38                         | 0.38              | 0.0e+00          | Inf          |
| C8      | CD7                          | 0.35              | 0.0e+00          | Inf          |
| C8      | CD27                         | 0.27              | 0.0e+00          | Inf          |
| C8      | CD31                         | 0.45              | 1.9e-203         | 91.10        |
| C8      | CD101 (BB27)                 | 0.31              | 3.6e-165         | 50.61        |
| C8      | CD183 (CXCR3)                | 0.25              | 6.1e-159         | 40.20        |
| C8      | CD9                          | 0.29              | 1.0e-50          | 14.26        |

**Supplemental Table 3:** Significant surface markers enriched in HIV+ versus HIV- cells for *in vitro* model. Test performed using the DESeq2 pseudobulk method in Seurat (two-tailed with multiple comparison adjustment using Bonferroni-Hochberg method).

| Subset | Cluster | Marker                                 | log2(fold change) | Adjusted p value | $\pi$ -score |
|--------|---------|----------------------------------------|-------------------|------------------|--------------|
| CD4+   | HIV-    | CD31                                   | -1.06             | 1.0e-158         | -167.94      |
| CD4+   | HIV-    | CD62L                                  | -0.52             | 9.1e-265         | -136.14      |
| CD4+   | HIV-    | CD55                                   | -0.52             | 1.0e-178         | -91.74       |
| CD4+   | HIV-    | CD27                                   | -0.37             | 1.8e-241         | -89.81       |
| CD4+   | HIV-    | CD7                                    | -0.38             | 5.9e-123         | -46.54       |
| CD4+   | HIV-    | CD9                                    | -0.52             | 8.2e-45          | -23.03       |
| CD4+   | HIV-    | CD45RA                                 | -0.22             | 1.9e-89          | -19.14       |
| CD4+   | HIV-    | CD38                                   | -0.27             | 1.4e-44          | -12.02       |
| CD4+   | HIV-    | CD3                                    | -0.06             | 7.5e-83          | -4.54        |
| CD4+   | HIV-    | TCR $\alpha/\beta$                     | -0.06             | 8.6e-72          | -4.20        |
| CD4+   | HIV-    | CD127 (IL-7R $\alpha$ )                | -0.09             | 4.5e-41          | -3.54        |
| CD4+   | HIV-    | CD272 (BTLA)                           | -0.11             | 1.3e-25          | -2.69        |
| CD4+   | HIV+    | CD195 (CCR5)                           | 2.08              | 2.2e-308         | 640.57       |
| CD4+   | HIV+    | CD150 (SLAM)                           | 1.64              | 2.2e-308         | 504.37       |
| CD4+   | HIV+    | CD279 (PD-1)                           | 1.36              | 1.3e-228         | 309.43       |
| CD4+   | HIV+    | CD49a                                  | 1.68              | 1.7e-172         | 288.33       |
| CD4+   | HIV+    | CD161                                  | 1.94              | 7.5e-145         | 279.09       |
| CD4+   | HIV+    | CD2                                    | 0.87              | 2.2e-308         | 267.60       |
| CD4+   | HIV+    | CD95 (Fas)                             | 0.97              | 5.6e-260         | 251.16       |
| CD4+   | HIV+    | CD49b                                  | 1.61              | 1.6e-154         | 247.25       |
| CD4+   | HIV+    | CD99                                   | 0.79              | 1.4e-235         | 185.04       |
| CD4+   | HIV+    | CD29                                   | 1.03              | 1.1e-173         | 177.44       |
| CD4+   | HIV+    | KLRG1 (MAFA)                           | 1.39              | 4.4e-115         | 158.63       |
| CD4+   | HIV+    | GPR56                                  | 1.34              | 1.4e-113         | 151.04       |
| CD4+   | HIV+    | HLA-DR, DP, DQ                         | 1.12              | 2.3e-134         | 149.85       |
| CD4+   | HIV+    | CD151 (PETA-3)                         | 1.04              | 1.3e-141         | 146.42       |
| CD4+   | HIV+    | CD226 (DNAM-1)                         | 0.84              | 3.9e-151         | 126.37       |
| CD4+   | HIV+    | CD58 (LFA-3)                           | 0.89              | 1.4e-121         | 107.82       |
| CD4+   | HIV+    | CD244 (2B4)                            | 1.21              | 4.7e-89          | 107.21       |
| CD4+   | HIV+    | CD69                                   | 1.37              | 1.1e-74          | 101.26       |
| CD4+   | HIV+    | HLA-DR                                 | 0.94              | 2.2e-100         | 93.74        |
| CD4+   | HIV+    | CD11a                                  | 0.60              | 3.4e-132         | 79.11        |
| CD4+   | HIV+    | CD196 (CCR6)                           | 0.99              | 2.2e-66          | 65.06        |
| CD4+   | HIV+    | CD49d                                  | 0.77              | 4.1e-83          | 63.34        |
| CD4+   | HIV+    | CD278 (ICOS)                           | 0.66              | 1.2e-95          | 62.58        |
| CD4+   | HIV+    | CD45RO                                 | 0.65              | 1.1e-85          | 55.12        |
| CD4+   | HIV+    | CD25                                   | 0.85              | 1.2e-53          | 45.13        |
| CD4+   | HIV+    | CD192 (CCR2)                           | 0.91              | 4.4e-49          | 43.98        |
| CD4+   | HIV+    | CD18                                   | 0.53              | 1.9e-75          | 39.68        |
| CD4+   | HIV+    | CD54                                   | 0.61              | 2.0e-65          | 39.15        |
| CD4+   | HIV+    | CD26                                   | 0.70              | 1.9e-53          | 36.72        |
| CD4+   | HIV+    | CD194 (CCR4)                           | 0.80              | 3.7e-44          | 34.62        |
| CD4+   | HIV+    | CD84                                   | 0.69              | 3.4e-49          | 33.30        |
| CD4+   | HIV+    | CD146                                  | 0.84              | 8.1e-40          | 32.93        |
| CD4+   | HIV+    | CD82                                   | 0.54              | 5.5e-54          | 28.76        |
| CD4+   | HIV+    | CD39                                   | 0.60              | 9.0e-45          | 26.33        |
| CD4+   | HIV+    | CD119 (IFN- $\gamma$ R $\alpha$ chain) | 0.60              | 1.7e-35          | 20.78        |
| CD4+   | HIV+    | CD81 (TAPA-1)                          | 0.52              | 9.3e-24          | 11.99        |
| CD4+   | HIV+    | CD305 (LAIR1)                          | 0.52              | 4.6e-22          | 11.02        |
| CD4+   | HIV+    | CD352 (NTB-A)                          | 0.43              | 3.0e-20          | 8.36         |
| CD4+   | HIV+    | CD73 (Ecto-5'-nucleotidase)            | 0.63              | 1.3e-13          | 8.05         |
| CD4+   | HIV+    | CD45                                   | 0.34              | 4.2e-22          | 7.27         |
| CD4+   | HIV+    | CD48                                   | 0.38              | 4.9e-19          | 7.05         |
| CD4+   | HIV+    | HLA-A,B,C                              | 0.43              | 2.2e-16          | 6.79         |



(continued)

| Subset                   | Cluster | Marker                                 | log2(fold change) | Adjusted p value | $\pi$ -score |
|--------------------------|---------|----------------------------------------|-------------------|------------------|--------------|
| CD4+                     | HIV+    | integrin $\beta$ 7                     | 0.47              | 3.9e-08          | 3.50         |
| CD4+                     | HIV+    | CD44                                   | 0.35              | 2.0e-10          | 3.36         |
| CD4+                     | HIV+    | CD183 (CXCR3)                          | 0.39              | 3.6e-07          | 2.50         |
| CD4+                     | HIV+    | CD52                                   | 0.12              | 5.3e-19          | 2.25         |
| CD4+                     | HIV+    | CD43                                   | 0.30              | 3.3e-07          | 1.94         |
| CD4+                     | HIV+    | CD47                                   | 0.01              | 1.8e-102         | 1.17         |
| CD4+                     | HIV+    | CD101 (BB27)                           | 0.37              | 6.0e-03          | 0.81         |
| CD4+                     | HIV+    | CD19                                   | 0.12              | 2.6e-07          | 0.81         |
| activated/late diff CD4+ | HIV-    | CD62L                                  | -0.38             | 1.0e-54          | -20.54       |
| activated/late diff CD4+ | HIV-    | CD127 (IL-7R $\alpha$ )                | -0.28             | 1.7e-20          | -5.57        |
| activated/late diff CD4+ | HIV-    | CD49f                                  | -0.31             | 4.4e-14          | -4.15        |
| activated/late diff CD4+ | HIV-    | CD185 (CXCR5)                          | -0.26             | 8.6e-13          | -3.09        |
| activated/late diff CD4+ | HIV-    | CD194 (CCR4)                           | -0.18             | 3.1e-08          | -1.33        |
| activated/late diff CD4+ | HIV-    | CD27                                   | -0.06             | 3.7e-14          | -0.77        |
| activated/late diff CD4+ | HIV-    | TIGIT (VSTM3)                          | -0.14             | 7.2e-06          | -0.70        |
| activated/late diff CD4+ | HIV-    | CD31                                   | -0.10             | 2.6e-04          | -0.37        |
| activated/late diff CD4+ | HIV-    | CD55                                   | -0.02             | 3.1e-05          | -0.07        |
| activated/late diff CD4+ | HIV-    | CD7                                    | -0.02             | 8.7e-03          | -0.04        |
| activated/late diff CD4+ | HIV-    | CD5                                    | -0.01             | 1.0e-03          | -0.02        |
| activated/late diff CD4+ | HIV-    | CD162                                  | 0.00              | 1.1e-03          | -0.01        |
| activated/late diff CD4+ | HIV+    | CD195 (CCR5)                           | 0.90              | 2.1e-32          | 28.34        |
| activated/late diff CD4+ | HIV+    | CD150 (SLAM)                           | 0.79              | 1.9e-35          | 27.31        |
| activated/late diff CD4+ | HIV+    | CD2                                    | 0.41              | 4.4e-36          | 14.40        |
| activated/late diff CD4+ | HIV+    | GPR56                                  | 0.86              | 7.3e-15          | 12.12        |
| activated/late diff CD4+ | HIV+    | CD279 (PD-1)                           | 0.66              | 1.1e-18          | 11.79        |
| activated/late diff CD4+ | HIV+    | CD95 (Fas)                             | 0.33              | 3.8e-16          | 5.13         |
| activated/late diff CD4+ | HIV+    | CD119 (IFN- $\gamma$ R $\alpha$ chain) | 0.46              | 2.5e-10          | 4.46         |
| activated/late diff CD4+ | HIV+    | CD26                                   | 0.41              | 2.5e-06          | 2.32         |
| activated/late diff CD4+ | HIV+    | HLA-DR, DP, DQ                         | 0.46              | 2.3e-05          | 2.13         |
| activated/late diff CD4+ | HIV+    | CD244 (2B4)                            | 0.57              | 2.8e-04          | 2.04         |
| activated/late diff CD4+ | HIV+    | CD11a                                  | 0.27              | 5.9e-08          | 1.97         |
| activated/late diff CD4+ | HIV+    | CD305 (LAIR1)                          | 0.42              | 2.3e-05          | 1.94         |
| activated/late diff CD4+ | HIV+    | CD146                                  | 0.55              | 4.1e-04          | 1.88         |
| activated/late diff CD4+ | HIV+    | CD161                                  | 0.59              | 2.1e-03          | 1.57         |
| activated/late diff CD4+ | HIV+    | CD73 (Ecto-5'-nucleotidase)            | 0.56              | 1.9e-03          | 1.53         |
| activated/late diff CD4+ | HIV+    | HLA-DR                                 | 0.43              | 3.4e-04          | 1.49         |
| activated/late diff CD4+ | HIV+    | CD54                                   | 0.29              | 9.6e-06          | 1.43         |
| activated/late diff CD4+ | HIV+    | CD151 (PETA-3)                         | 0.38              | 1.6e-03          | 1.07         |
| activated/late diff CD4+ | HIV+    | CD196 (CCR6)                           | 0.48              | 6.5e-03          | 1.06         |
| activated/late diff CD4+ | HIV+    | CD192 (CCR2)                           | 0.52              | 1.7e-02          | 0.92         |
| activated/late diff CD4+ | HIV+    | CD48                                   | 0.23              | 2.5e-04          | 0.82         |
| activated/late diff CD4+ | HIV+    | CD25                                   | 0.30              | 2.1e-03          | 0.81         |
| activated/late diff CD4+ | HIV+    | CD49b                                  | 0.38              | 9.3e-03          | 0.77         |
| activated/late diff CD4+ | HIV+    | KLRG1 (MAFA)                           | 0.50              | 3.4e-02          | 0.74         |
| activated/late diff CD4+ | HIV+    | CD49a                                  | 0.43              | 4.5e-02          | 0.58         |
| activated/late diff CD4+ | HIV+    | CD101 (BB27)                           | 0.39              | 4.1e-02          | 0.53         |
| activated/late diff CD4+ | HIV+    | CD99                                   | 0.22              | 5.1e-03          | 0.50         |
| activated/late diff CD4+ | HIV+    | CD47                                   | 0.05              | 5.9e-07          | 0.30         |
| activated/late diff CD4+ | HIV+    | CD52                                   | 0.07              | 3.0e-03          | 0.17         |
| activated/late diff CD4+ | HIV+    | CD82                                   | 0.07              | 1.7e-02          | 0.13         |
| early diff CD4+          | HIV-    | CD62L                                  | -0.27             | 7.0e-31          | -8.17        |
| early diff CD4+          | HIV-    | CD55                                   | -0.24             | 1.3e-19          | -4.57        |
| early diff CD4+          | HIV-    | CD127 (IL-7R $\alpha$ )                | -0.09             | 4.5e-14          | -1.21        |
| early diff CD4+          | HIV-    | CD162                                  | -0.10             | 1.7e-10          | -0.96        |
| early diff CD4+          | HIV-    | CD45RA                                 | -0.08             | 1.2e-10          | -0.77        |
| early diff CD4+          | HIV+    | CD278 (ICOS)                           | 0.57              | 3.0e-17          | 9.46         |

(continued)

| Subset          | Cluster | Marker         | log2(fold change) | Adjusted p value | $\pi$ -score |
|-----------------|---------|----------------|-------------------|------------------|--------------|
| early diff CD4+ | HIV+    | CD25           | 0.79              | 2.5e-12          | 9.21         |
| early diff CD4+ | HIV+    | CD183 (CXCR3)  | 0.77              | 8.0e-10          | 7.00         |
| early diff CD4+ | HIV+    | CD11a          | 0.55              | 1.1e-12          | 6.53         |
| early diff CD4+ | HIV+    | CD49b          | 0.67              | 1.7e-09          | 5.87         |
| early diff CD4+ | HIV+    | CD2            | 0.50              | 3.4e-09          | 4.24         |
| early diff CD4+ | HIV+    | CD38           | 0.60              | 5.4e-07          | 3.74         |
| early diff CD4+ | HIV+    | CD151 (PETA-3) | 0.60              | 1.4e-06          | 3.54         |
| early diff CD4+ | HIV+    | CD305 (LAIR1)  | 0.57              | 8.3e-06          | 2.89         |
| early diff CD4+ | HIV+    | CD71           | 0.52              | 2.5e-04          | 1.87         |
| early diff CD4+ | HIV+    | CD18           | 0.45              | 1.1e-04          | 1.80         |
| early diff CD4+ | HIV+    | CD47           | 0.10              | 4.5e-17          | 1.69         |
| early diff CD4+ | HIV+    | CD101 (BB27)   | 0.57              | 1.6e-03          | 1.61         |
| early diff CD4+ | HIV+    | HLA-A,B,C      | 0.18              | 5.3e-07          | 1.10         |
| early diff CD4+ | HIV+    | CD95 (Fas)     | 0.42              | 5.6e-03          | 0.95         |
| early diff CD4+ | HIV+    | CD4            | 0.42              | 1.1e-02          | 0.82         |
| early diff CD4+ | HIV+    | CD19           | 0.12              | 3.9e-02          | 0.16         |
| early diff CD4+ | HIV+    | CD49f          | 0.04              | 3.0e-03          | 0.10         |

**Supplemental Table 4:** Differential peak list for activated CD4+ cells between HIV+ and HIV- for *in vitro* model.

| Subset | Chr   | Start     | End       | Log2FC | FDR     | $\pi$ -score | In Gene                                                                 | Nearest TSS  | Nearest TSS Dist |
|--------|-------|-----------|-----------|--------|---------|--------------|-------------------------------------------------------------------------|--------------|------------------|
| HIV-   | chrX  | 133763071 | 133763571 | -5.76  | 2.0e-02 | -9.73        | GPC3                                                                    | GPC3         | 222324           |
| HIV-   | chr11 | 128840083 | 128840583 | -2.32  | 3.4e-04 | -8.04        | KCNJ1                                                                   | KCNJ1        | 26790            |
| HIV-   | chr3  | 120344302 | 120344802 | -1.62  | 4.3e-04 | -5.47        | LRRRC58                                                                 | LRRRC58      | 4537             |
| HIV-   | chr16 | 29013010  | 29013510  | -1.51  | 4.3e-04 | -5.08        | MIR3680-1                                                               | LAT          | 28184            |
| HIV-   | chr5  | 75078009  | 75078509  | -2.44  | 9.5e-03 | -4.94        | ANKRD31                                                                 | LINC01336    | -25166           |
| HIV-   | chr17 | 62164986  | 62165486  | -3.33  | 4.4e-02 | -4.51        | -                                                                       | MED13        | -99704           |
| HIV-   | chr13 | 73984895  | 73985395  | -1.91  | 7.8e-03 | -4.03        | KLF12                                                                   | KLF12        | 148510           |
| HIV-   | chr7  | 127322273 | 127322773 | -1.49  | 2.1e-03 | -4.00        | -                                                                       | GRM8         | -68979           |
| HIV-   | chr6  | 149366167 | 149366667 | -1.44  | 1.8e-03 | -3.93        | TAB2                                                                    | SUMO4        | -33560           |
| HIV-   | chr1  | 87045694  | 87046194  | -2.48  | 2.7e-02 | -3.89        | HS2ST1,<br>LINC01140                                                    | LINC01140    | 52685            |
| HIV-   | chr5  | 109921610 | 109922110 | -1.41  | 2.0e-03 | -3.82        | -                                                                       | LINC01848    | 38428            |
| HIV-   | chr5  | 39186867  | 39187367  | -1.84  | 8.4e-03 | -3.82        | FYB1                                                                    | FYB1         | 87161            |
| HIV-   | chr10 | 3800532   | 3801032   | -2.74  | 4.7e-02 | -3.65        | -                                                                       | KLF6         | -15251           |
| HIV-   | chr1  | 39653445  | 39653945  | -1.90  | 1.7e-02 | -3.35        | -                                                                       | HEYL         | -13500           |
| HIV-   | chr3  | 10263496  | 10263996  | -2.19  | 3.0e-02 | -3.34        | TATDN2                                                                  | TATDN2       | 15473            |
| HIV-   | chr8  | 120472266 | 120472766 | -2.41  | 4.5e-02 | -3.25        | MTBP                                                                    | MRPL13       | -26864           |
| HIV-   | chr7  | 1925895   | 1926395   | -1.53  | 7.8e-03 | -3.23        | MAD1L1                                                                  | MIR4655      | -81642           |
| HIV-   | chrX  | 136674455 | 136674955 | -1.51  | 7.8e-03 | -3.18        | ARHGEF6                                                                 | CD40LG       | 26262            |
| HIV-   | chr12 | 64494944  | 64495444  | -1.89  | 2.1e-02 | -3.17        | TBK1                                                                    | TBK1         | 43064            |
| HIV-   | chr15 | 44560876  | 44561376  | -1.87  | 2.1e-02 | -3.15        | EIF3J                                                                   | EIF3J        | 23819            |
| HIV-   | chr8  | 120775213 | 120775713 | -2.19  | 3.8e-02 | -3.13        | SNTB1,<br>LOC101927543                                                  | LOC101927543 | 13960            |
| HIV-   | chr11 | 14463556  | 14464056  | -2.33  | 4.7e-02 | -3.10        | COPB1                                                                   | COPB1        | 35971            |
| HIV-   | chr6  | 37289865  | 37290365  | -2.29  | 4.6e-02 | -3.06        | TBC1D22B                                                                | TMEM217      | -31710           |
| HIV-   | chr15 | 88904581  | 88905081  | -1.01  | 2.0e-03 | -2.72        | MFGE8                                                                   | MFGE8        | 8330             |
| HIV-   | chr3  | 153643435 | 153643935 | -1.59  | 2.1e-02 | -2.68        | -                                                                       | C3orf79      | 158940           |
| HIV-   | chr16 | 29827058  | 29827558  | -1.85  | 4.4e-02 | -2.52        | BOLA2, SLX1A,<br>SLX1A-SULT1A3,<br>SULT1A4,<br>LOC388242,<br>PAGR1, MVP | MVP          | 6664             |
| HIV-   | chr2  | 203987082 | 203987582 | -1.65  | 4.4e-02 | -2.24        | -                                                                       | ICOS         | 50334            |
| HIV-   | chr3  | 187027350 | 187027850 | -1.03  | 7.8e-03 | -2.18        | ST6GAL1                                                                 | ST6GAL1      | 96865            |
| HIV-   | chr10 | 118732697 | 118733197 | -1.59  | 4.8e-02 | -2.09        | CACUL1                                                                  | CACUL1       | 22052            |
| HIV-   | chr3  | 118955786 | 118956286 | -1.29  | 4.1e-02 | -1.78        | IGSF11                                                                  | IGSF11-AS1   | 12713            |
| HIV-   | chr13 | 49371836  | 49372336  | -1.12  | 3.1e-02 | -1.70        | CAB39L                                                                  | CAB39L       | 71790            |
| HIV-   | chr14 | 32102444  | 32102944  | -1.21  | 4.5e-02 | -1.63        | ARHGAP5                                                                 | ARHGAP5-AS1  | -25651           |
| HIV-   | chr10 | 43332102  | 43332602  | -1.16  | 4.0e-02 | -1.62        | -                                                                       | FXYD4        | -39040           |
| HIV-   | chr1  | 100927241 | 100927741 | -0.91  | 3.0e-02 | -1.38        | SLC30A7                                                                 | SLC30A7      | 31165            |

(continued)

| Subset | Chr   | Start     | End       | Log2FC | FDR     | $\pi$ -score | In Gene              | Nearest TSS  | Nearest TSS Dist |
|--------|-------|-----------|-----------|--------|---------|--------------|----------------------|--------------|------------------|
| HIV-   | chr17 | 66331088  | 66331588  | -0.94  | 3.4e-02 | -1.38        | PRKCA                | PRKCA        | 28452            |
| HIV-   | chr14 | 89903512  | 89904012  | -1.01  | 4.7e-02 | -1.34        | FOXN3, EFCAB11       | FOXN3        | 50647            |
| HIV-   | chr13 | 51825061  | 51825561  | -0.85  | 2.7e-02 | -1.33        | TMEM272              | TMEM272      | 19614            |
| HIV-   | chr16 | 27235313  | 27235813  | -0.99  | 4.6e-02 | -1.32        | MIR3680-1,<br>NSMCE1 | KDM8         | 31818            |
| HIV-   | chr10 | 110225646 | 110226146 | -0.83  | 2.6e-02 | -1.32        | MXI1                 | MXI1         | 18041            |
| HIV-   | chr13 | 40485590  | 40486090  | -0.61  | 1.5e-02 | -1.10        | LINC00598            | LINC00598    | 49717            |
| HIV+   | chr1  | 221829595 | 221830095 | 1.39   | 3.9e-05 | 6.15         | LINC01655            | LINC01655    | 10571            |
| HIV+   | chr9  | 73869213  | 73869713  | 2.09   | 1.4e-03 | 5.99         | -                    | LOC101927358 | -501818          |
| HIV+   | chr6  | 117465645 | 117466145 | 2.53   | 6.7e-03 | 5.50         | GOPC, DCBLD1         | DCBLD1       | 11828            |
| HIV+   | chr14 | 68719698  | 68720198  | 1.16   | 3.5e-05 | 5.17         | -                    | ZFP36L1      | 76055            |
| HIV+   | chr8  | 72000175  | 72000675  | 1.52   | 1.4e-03 | 4.34         | MSC-AS1              | TRPA1        | 74942            |
| HIV+   | chr14 | 59275611  | 59276111  | 1.76   | 5.1e-03 | 4.05         | DAAM1                | DAAM1        | 86965            |
| HIV+   | chr15 | 101199696 | 101200196 | 1.15   | 3.3e-04 | 4.00         | CHSY1                | CHSY1        | 51736            |
| HIV+   | chr9  | 75148484  | 75148984  | 2.03   | 1.1e-02 | 3.99         | -                    | OSTF1        | 59941            |
| HIV+   | chr15 | 90412628  | 90413128  | 2.94   | 4.4e-02 | 3.98         | IQGAP1               | IQGAP1       | 24410            |
| HIV+   | chr6  | 13747556  | 13748056  | 1.10   | 4.3e-04 | 3.70         | -                    | RANBP9       | -35992           |
| HIV+   | chr2  | 101223824 | 101224324 | 1.52   | 5.4e-03 | 3.44         | TBC1D8               | CNOT11       | -28478           |
| HIV+   | chr2  | 136362680 | 136363180 | 1.86   | 1.5e-02 | 3.38         | -                    | CXCR4        | -244515          |
| HIV+   | chr3  | 71447689  | 71448189  | 2.51   | 4.6e-02 | 3.36         | FOXP1                | MIR1284      | 93900            |
| HIV+   | chr9  | 86348418  | 86348918  | 1.66   | 9.7e-03 | 3.35         | TUT7                 | TUT7         | 5536             |
| HIV+   | chr7  | 23595009  | 23595509  | 2.50   | 4.7e-02 | 3.32         | -                    | CCDC126      | -1870            |
| HIV+   | chr11 | 14288180  | 14288680  | 1.57   | 9.1e-03 | 3.22         | RRAS2                | RRAS2        | 75826            |
| HIV+   | chr3  | 71392986  | 71393486  | 1.90   | 2.0e-02 | 3.22         | FOXP1                | FOXP1-AS1    | 103217           |
| HIV+   | chr17 | 3795234   | 3795734   | 1.80   | 2.0e-02 | 3.04         | ITGAE                | ITGAE        | 5509             |
| HIV+   | chr1  | 25099439  | 25099939  | 2.11   | 3.8e-02 | 3.00         | -                    | MIR4425      | 75936            |
| HIV+   | chr11 | 43316418  | 43316918  | 2.09   | 3.8e-02 | 2.97         | API5                 | API5         | 4455             |
| HIV+   | chr13 | 27131122  | 27131622  | 0.85   | 3.8e-04 | 2.89         | USP12                | USP12-AS1    | -31233           |
| HIV+   | chr5  | 72194799  | 72195299  | 2.07   | 4.0e-02 | 2.88         | MAP1B                | MIR4803      | 25332            |
| HIV+   | chr4  | 26076133  | 26076633  | 1.52   | 1.5e-02 | 2.75         | -                    | RBPJ         | -86822           |
| HIV+   | chr16 | 82660155  | 82660655  | 2.05   | 4.8e-02 | 2.70         | CDH13                | MIR8058      | -28276           |
| HIV+   | chr15 | 38610792  | 38611292  | 1.30   | 9.1e-03 | 2.66         | -                    | RASGRP1      | -45217           |
| HIV+   | chr8  | 133152859 | 133153359 | 1.20   | 7.0e-03 | 2.58         | -                    | WISP1        | -37680           |
| HIV+   | chr8  | 28365700  | 28366200  | 1.93   | 4.8e-02 | 2.53         | ZNF395               | PNOC         | 48714            |
| HIV+   | chr10 | 22505996  | 22506496  | 1.85   | 4.5e-02 | 2.48         | -                    | SPAG6        | 160551           |
| HIV+   | chr11 | 34235166  | 34235666  | 1.43   | 2.0e-02 | 2.41         | ABTB2                | ABTB2        | 122342           |
| HIV+   | chr4  | 121256332 | 121256832 | 1.18   | 9.5e-03 | 2.39         | -                    | TNIP3        | -28866           |
| HIV+   | chr16 | 23504680  | 23505180  | 1.09   | 6.7e-03 | 2.37         | MIR3680-1, GGA2      | GGA2         | 16815            |
| HIV+   | chr5  | 127785555 | 127786055 | 1.07   | 8.4e-03 | 2.22         | CCDC192              | CCDC192      | 82165            |
| HIV+   | chr8  | 97980061  | 97980561  | 1.27   | 2.0e-02 | 2.14         | MATN2                | SNORA72      | 61656            |
| HIV+   | chr10 | 22597125  | 22597625  | 1.60   | 4.7e-02 | 2.13         | PIP4K2A              | PIP4K2A      | 116930           |

(continued)

| Subset | Chr   | Start     | End       | Log2FC | FDR     | $\pi$ -score | In Gene      | Nearest TSS | Nearest TSS Dist |
|--------|-------|-----------|-----------|--------|---------|--------------|--------------|-------------|------------------|
| HIV+   | chr2  | 65232542  | 65233042  | 1.24   | 2.0e-02 | 2.10         | ACTR2        | ACTR2       | 4789             |
| HIV+   | chr11 | 128551675 | 128552175 | 1.22   | 2.2e-02 | 2.03         | ETS1         | ETS1-AS1    | 25533            |
| HIV+   | chr13 | 50245013  | 50245513  | 1.42   | 3.9e-02 | 2.01         | DLEU1        | DLEU2       | -119293          |
| HIV+   | chr3  | 46369194  | 46369694  | 1.43   | 4.1e-02 | 1.97         | LOC102724297 | CCR5        | -1160            |
| HIV+   | chr10 | 88270827  | 88271327  | 1.03   | 1.2e-02 | 1.96         | -            | RNLS        | 313203           |
| HIV+   | chr6  | 108921393 | 108921893 | 1.19   | 2.4e-02 | 1.94         | ARMC2        | ARMC2-AS1   | 2210             |
| HIV+   | chr1  | 32263726  | 32264226  | 1.42   | 4.5e-02 | 1.91         | LCK          | LCK         | 12487            |
| HIV+   | chr8  | 100493218 | 100493718 | 1.33   | 4.7e-02 | 1.76         | -            | ANKRD46     | 66066            |
| HIV+   | chr4  | 101039328 | 101039828 | 1.24   | 4.1e-02 | 1.73         | PPP3CA       | EMCN        | -159202          |
| HIV+   | chr2  | 178514591 | 178515091 | 0.78   | 6.4e-03 | 1.71         | PLEKHA3      | TTN-AS1     | -6092            |
| HIV+   | chr3  | 155862523 | 155863023 | 1.29   | 4.8e-02 | 1.70         | -            | GMPS        | -7513            |
| HIV+   | chr14 | 74573941  | 74574441  | 1.08   | 4.3e-02 | 1.48         | LTBP2        | LTBP2       | 37937            |
| HIV+   | chr22 | 39961397  | 39961897  | 0.87   | 2.0e-02 | 1.47         | GRAP2        | FAM83F      | -33052           |
| HIV+   | chr13 | 76991309  | 76991809  | 0.65   | 1.3e-02 | 1.21         | CLN5         | CLN5        | 649              |
| HIV+   | chr8  | 66467771  | 66468271  | 0.76   | 4.1e-02 | 1.06         | ADHFE1, VXN  | VXN         | 7768             |

**Supplemental Table 5:** Significant surface markers enriched in each cluster (over all other cells) during chronic infection. Significance calculated in Seurat using two-sided Wilcoxon test with multiple comparison adjustment using Bonferroni-Hochberg method.

| Cluster | Marker                         | log2(fold change) | Adjusted p value | $\pi$ -score |
|---------|--------------------------------|-------------------|------------------|--------------|
| C1      | CX3CR1                         | 0.62              | 4.3e-226         | 138.97       |
| C1      | CD275 (B7-H2, B7-RP1, ICOSL)   | 0.57              | 1.6e-235         | 133.74       |
| C1      | CD303 (BDCA-2)                 | 0.52              | 2.6e-220         | 115.20       |
| C1      | IgE                            | 0.53              | 2.9e-205         | 109.34       |
| C1      | LOX-1                          | 0.51              | 2.4e-207         | 105.69       |
| C1      | CD79b (Ig $\beta$ )            | 0.55              | 9.5e-188         | 102.25       |
| C1      | CD74                           | 0.50              | 1.5e-192         | 95.36        |
| C1      | CD83                           | 0.51              | 1.1e-184         | 93.93        |
| C1      | NKp80                          | 0.47              | 9.0e-194         | 91.56        |
| C1      | CD137 (4-1BB)                  | 0.43              | 1.1e-210         | 89.65        |
| C1      | CD142                          | 0.42              | 4.6e-197         | 82.21        |
| C1      | CD93                           | 0.45              | 2.1e-180         | 81.08        |
| C1      | CD169 (Sialoadhesin, Siglec-1) | 0.42              | 1.8e-185         | 77.71        |
| C1      | CD23                           | 0.46              | 2.6e-163         | 74.28        |
| C1      | CD163                          | 0.47              | 1.8e-155         | 72.27        |
| C1      | CD192 (CCR2)                   | 0.44              | 2.7e-162         | 71.81        |
| C1      | CD134 (OX40)                   | 0.43              | 1.5e-164         | 71.25        |
| C1      | CD24                           | 0.42              | 1.8e-160         | 67.51        |
| C1      | CD112 (Nectin-2)               | 0.41              | 2.3e-166         | 67.17        |
| C1      | CD154                          | 0.40              | 4.2e-153         | 61.51        |
| C1      | CD158e1 (KIR3DL1, NKB1)        | 0.33              | 3.5e-188         | 61.28        |
| C1      | CD42b                          | 0.30              | 5.7e-202         | 59.72        |
| C1      | CD45RA                         | 0.39              | 2.5e-152         | 58.99        |
| C1      | CD223 (LAG-3)                  | 0.41              | 2.5e-142         | 58.28        |
| C1      | CD116                          | 0.37              | 1.7e-156         | 57.63        |
| C1      | CD109                          | 0.36              | 5.9e-152         | 54.43        |
| C1      | Fc $\epsilon$ R1 $\alpha$      | 0.32              | 4.6e-161         | 51.11        |
| C1      | CD85j (ILT2)                   | 0.36              | 2.7e-141         | 50.70        |
| C1      | CD158 (KIR2DL1/S1/S3/S5)       | 0.29              | 1.4e-172         | 50.35        |
| C1      | CD196 (CCR6)                   | 0.37              | 1.1e-109         | 40.72        |
| C1      | CD14                           | 0.29              | 2.4e-142         | 40.51        |
| C1      | CD314 (NKG2D)                  | 0.37              | 9.2e-108         | 39.46        |
| C1      | Ig light chain $\lambda$       | 0.30              | 1.7e-128         | 38.92        |
| C1      | CD115 (CSF-1R)                 | 0.31              | 4.8e-119         | 37.04        |
| C1      | KLRG1 (MAFA)                   | 0.33              | 1.6e-110         | 36.20        |
| C1      | CD13                           | 0.28              | 1.9e-127         | 35.76        |
| C1      | CD141 (Thrombomodulin)         | 0.29              | 6.2e-123         | 35.06        |
| C1      | Ig light chain $\kappa$        | 0.28              | 4.9e-105         | 29.01        |
| C1      | Podoplanin                     | 0.29              | 1.1e-95          | 27.21        |
| C1      | CD152 (CTLA-4)                 | 0.26              | 1.1e-104         | 26.83        |
| C1      | CD122 (IL-2R $\beta$ )         | 0.28              | 1.3e-77          | 21.83        |
| C1      | CD150 (SLAM)                   | 0.27              | 3.0e-78          | 21.23        |
| C10     | CD9                            | 1.50              | 2.2e-68          | 101.61       |
| C10     | CD38                           | 1.23              | 2.7e-83          | 101.21       |
| C10     | CD19                           | 1.00              | 3.9e-79          | 78.25        |
| C10     | CD319 (CRACC)                  | 0.85              | 1.0e-84          | 71.54        |
| C10     | CD39                           | 0.94              | 1.5e-64          | 59.97        |
| C10     | CD63                           | 0.94              | 1.5e-57          | 53.35        |
| C10     | CD21                           | 0.91              | 2.9e-58          | 52.55        |
| C10     | CD31                           | 0.89              | 2.6e-59          | 52.09        |
| C10     | CD32                           | 0.96              | 1.9e-51          | 48.71        |
| C10     | CD54                           | 0.77              | 4.0e-56          | 42.44        |
| C10     | CD22                           | 0.65              | 2.7e-46          | 29.62        |
| C10     | CD72                           | 0.66              | 4.1e-40          | 26.05        |

(continued)

| Cluster | Marker                                 | log2(fold change) | Adjusted p value | $\pi$ -score |
|---------|----------------------------------------|-------------------|------------------|--------------|
| C10     | HLA-DR, DP, DQ                         | 0.73              | 1.6e-33          | 23.89        |
| C10     | CD55                                   | 0.61              | 9.5e-38          | 22.74        |
| C10     | HLA-DR                                 | 0.61              | 5.2e-34          | 20.30        |
| C10     | CD85j (ILT2)                           | 0.46              | 9.1e-33          | 14.86        |
| C10     | CD40                                   | 0.40              | 1.9e-28          | 11.22        |
| C10     | CD71                                   | 0.46              | 4.2e-24          | 10.79        |
| C10     | CD35                                   | 0.41              | 3.5e-19          | 7.58         |
| C10     | CD81 (TAPA-1)                          | 0.29              | 7.9e-18          | 5.01         |
| C10     | CD150 (SLAM)                           | 0.25              | 5.5e-09          | 2.10         |
| C11     | CD72                                   | 1.33              | 5.4e-166         | 220.51       |
| C11     | CD22                                   | 1.28              | 2.0e-165         | 211.01       |
| C11     | CD35                                   | 1.19              | 8.5e-146         | 173.19       |
| C11     | CD21                                   | 1.23              | 3.1e-139         | 170.49       |
| C11     | CD19                                   | 1.03              | 2.5e-152         | 156.52       |
| C11     | CD32                                   | 1.17              | 1.2e-126         | 147.83       |
| C11     | CD20                                   | 0.91              | 1.4e-155         | 140.92       |
| C11     | CD37                                   | 0.79              | 3.5e-136         | 106.37       |
| C11     | CD40                                   | 0.73              | 2.6e-132         | 96.03        |
| C11     | HLA-DR, DP, DQ                         | 0.83              | 6.7e-114         | 93.44        |
| C11     | HLA-DR                                 | 0.70              | 4.9e-123         | 85.04        |
| C11     | IgM                                    | 0.82              | 1.2e-101         | 82.69        |
| C11     | CD73 (Ecto-5'-nucleotidase)            | 0.87              | 2.4e-84          | 72.90        |
| C11     | CD31                                   | 0.56              | 1.9e-84          | 46.71        |
| C11     | CD196 (CCR6)                           | 0.50              | 1.9e-74          | 36.81        |
| C11     | CD55                                   | 0.52              | 2.4e-70          | 35.99        |
| C11     | CD85j (ILT2)                           | 0.47              | 4.2e-75          | 34.59        |
| C11     | CD63                                   | 0.46              | 2.2e-67          | 30.89        |
| C11     | CD54                                   | 0.44              | 5.5e-71          | 30.69        |
| C11     | CD119 (IFN- $\gamma$ R $\alpha$ chain) | 0.38              | 1.3e-62          | 23.38        |
| C11     | CD24                                   | 0.45              | 9.5e-51          | 22.64        |
| C11     | CD49d                                  | 0.40              | 3.5e-53          | 21.09        |
| C11     | Ig light chain $\lambda$               | 0.50              | 3.5e-36          | 17.65        |
| C11     | CD74                                   | 0.35              | 5.4e-48          | 16.46        |
| C11     | Ig light chain $\kappa$                | 0.39              | 1.9e-42          | 16.38        |
| C11     | CD1c                                   | 0.35              | 5.3e-48          | 16.35        |
| C11     | CD82                                   | 0.29              | 3.4e-45          | 12.86        |
| C11     | CD267 (TACI)                           | 0.32              | 1.9e-39          | 12.30        |
| C11     | Podoplanin                             | 0.33              | 3.6e-34          | 10.97        |
| C11     | CD83                                   | 0.35              | 2.1e-31          | 10.73        |
| C11     | CD23                                   | 0.36              | 3.0e-28          | 9.79         |
| C11     | CD39                                   | 0.30              | 1.1e-31          | 9.26         |
| C11     | CD305 (LAIR1)                          | 0.32              | 1.6e-15          | 4.80         |
| C11     | CD9                                    | 0.26              | 1.5e-12          | 3.04         |
| C2      | CD200 (OX2)                            | 1.09              | 0.0e+00          | Inf          |
| C2      | CD57                                   | 1.06              | 0.0e+00          | Inf          |
| C2      | CD279 (PD-1)                           | 0.82              | 0.0e+00          | Inf          |
| C2      | CD69                                   | 0.78              | 0.0e+00          | Inf          |
| C2      | CD71                                   | 0.71              | 0.0e+00          | Inf          |
| C2      | TIGIT (VSTM3)                          | 0.67              | 0.0e+00          | Inf          |
| C2      | CD278 (ICOS)                           | 0.64              | 0.0e+00          | Inf          |
| C2      | CD185 (CXCR5)                          | 0.61              | 0.0e+00          | Inf          |
| C2      | CD272 (BTLA)                           | 0.59              | 0.0e+00          | Inf          |
| C2      | CD11a                                  | 0.37              | 0.0e+00          | Inf          |
| C2      | CD151 (PETA-3)                         | 0.45              | 6.8e-305         | 138.39       |
| C2      | CD27                                   | 0.40              | 3.4e-251         | 101.30       |
| C2      | CD18                                   | 0.37              | 8.3e-255         | 93.60        |

(continued)

| Cluster | Marker                         | log2(fold change) | Adjusted p value | $\pi$ -score |
|---------|--------------------------------|-------------------|------------------|--------------|
| C2      | CD95 (Fas)                     | 0.28              | 1.2e-297         | 83.36        |
| C2      | CD45                           | 0.29              | 1.4e-256         | 73.97        |
| C2      | CD45RO                         | 0.27              | 7.2e-241         | 64.65        |
| C3      | CD95 (Fas)                     | 0.31              | 2.7e-88          | 26.87        |
| C3      | CD195 (CCR5)                   | 0.55              | 1.9e-47          | 25.52        |
| C3      | CD25                           | 0.43              | 8.8e-58          | 24.62        |
| C3      | CD162                          | 0.38              | 4.0e-48          | 18.15        |
| C3      | CD38                           | 0.36              | 1.9e-49          | 17.39        |
| C3      | CD71                           | 0.41              | 5.0e-41          | 16.66        |
| C3      | CD278 (ICOS)                   | 0.34              | 4.4e-46          | 15.52        |
| C3      | CD39                           | 0.42              | 5.7e-37          | 15.33        |
| C3      | HLA-DR, DP, DQ                 | 0.29              | 8.4e-43          | 12.13        |
| C3      | CD101 (BB27)                   | 0.38              | 3.5e-22          | 8.15         |
| C3      | CD49d                          | 0.26              | 3.7e-20          | 4.98         |
| C3      | CD8                            | 0.30              | 3.4e-10          | 2.81         |
| C4      | CD49f                          | 0.41              | 7.5e-44          | 17.58        |
| C4      | CD127 (IL-7R $\alpha$ )        | 0.39              | 3.5e-43          | 16.64        |
| C4      | CD29                           | 0.29              | 4.4e-38          | 10.92        |
| C5      | CD7                            | 0.54              | 0.0e+00          | Inf          |
| C5      | CD99                           | 0.46              | 0.0e+00          | Inf          |
| C5      | CD5                            | 0.44              | 0.0e+00          | Inf          |
| C5      | CD48                           | 0.42              | 0.0e+00          | Inf          |
| C5      | CD4                            | 0.36              | 0.0e+00          | Inf          |
| C5      | CD47                           | 0.33              | 0.0e+00          | Inf          |
| C5      | CD3                            | 0.30              | 0.0e+00          | Inf          |
| C5      | CD49f                          | 0.50              | 7.9e-280         | 139.01       |
| C5      | CD127 (IL-7R $\alpha$ )        | 0.46              | 2.2e-254         | 117.40       |
| C5      | CD62L                          | 0.41              | 4.7e-251         | 103.77       |
| C5      | CD44                           | 0.32              | 1.0e-278         | 88.65        |
| C5      | CD69                           | 0.43              | 1.9e-166         | 71.55        |
| C5      | HLA-A,B,C                      | 0.27              | 9.4e-251         | 68.41        |
| C5      | CD45                           | 0.29              | 5.9e-231         | 67.73        |
| C5      | CD52                           | 0.28              | 3.7e-234         | 66.02        |
| C5      | CD2                            | 0.28              | 6.5e-229         | 64.67        |
| C5      | CD29                           | 0.31              | 2.4e-172         | 53.89        |
| C5      | CD27                           | 0.33              | 3.8e-164         | 53.36        |
| C5      | CD162                          | 0.30              | 1.3e-157         | 47.68        |
| C5      | CD55                           | 0.32              | 5.4e-142         | 45.65        |
| C5      | CD305 (LAIR1)                  | 0.31              | 1.6e-103         | 32.14        |
| C5      | CD49a                          | 0.39              | 5.5e-60          | 23.33        |
| C6      | CX3CR1                         | 0.61              | 1.4e-241         | 147.28       |
| C6      | CD303 (BDCA-2)                 | 0.54              | 1.3e-228         | 124.11       |
| C6      | CD275 (B7-H2, B7-RP1, ICOSL)   | 0.53              | 8.6e-220         | 116.31       |
| C6      | IgE                            | 0.53              | 8.6e-209         | 111.07       |
| C6      | CD83                           | 0.54              | 1.8e-203         | 108.95       |
| C6      | CD79b (Ig $\beta$ )            | 0.50              | 2.2e-205         | 103.05       |
| C6      | CD24                           | 0.52              | 8.0e-187         | 97.40        |
| C6      | CD192 (CCR2)                   | 0.49              | 4.4e-198         | 96.54        |
| C6      | LOX-1                          | 0.48              | 2.8e-196         | 94.37        |
| C6      | CD169 (Sialoadhesin, Siglec-1) | 0.45              | 1.7e-202         | 91.08        |
| C6      | CD74                           | 0.43              | 7.0e-207         | 88.07        |
| C6      | NKp80                          | 0.47              | 8.4e-189         | 87.53        |
| C6      | CD115 (CSF-1R)                 | 0.45              | 6.4e-195         | 87.20        |
| C6      | CD141 (Thrombomodulin)         | 0.42              | 1.4e-206         | 86.29        |
| C6      | CD223 (LAG-3)                  | 0.49              | 2.9e-172         | 84.63        |
| C6      | CD23                           | 0.45              | 1.0e-170         | 76.74        |



(continued)

| Cluster | Marker                    | log2(fold change) | Adjusted p value | $\pi$ -score |
|---------|---------------------------|-------------------|------------------|--------------|
| C6      | CD142                     | 0.40              | 5.6e-190         | 74.80        |
| C6      | CD163                     | 0.42              | 1.9e-176         | 74.27        |
| C6      | CD116                     | 0.41              | 1.2e-181         | 73.67        |
| C6      | CD134 (OX40)              | 0.44              | 8.0e-166         | 72.53        |
| C6      | CD45RA                    | 0.37              | 1.4e-186         | 69.07        |
| C6      | CD137 (4-1BB)             | 0.39              | 5.6e-176         | 67.86        |
| C6      | CD158e1 (KIR3DL1, NKB1)   | 0.34              | 5.4e-195         | 66.70        |
| C6      | Podoplanin                | 0.42              | 2.8e-159         | 66.24        |
| C6      | CD109                     | 0.39              | 2.2e-166         | 63.91        |
| C6      | CD314 (NKG2D)             | 0.41              | 1.5e-145         | 59.78        |
| C6      | CD112 (Nectin-2)          | 0.36              | 1.3e-151         | 53.65        |
| C6      | CD154                     | 0.38              | 2.1e-133         | 50.26        |
| C6      | CD93                      | 0.32              | 4.3e-155         | 49.73        |
| C6      | GPR56                     | 0.32              | 4.7e-153         | 48.54        |
| C6      | CD14                      | 0.29              | 1.9e-161         | 46.26        |
| C6      | Ig light chain $\lambda$  | 0.32              | 1.7e-138         | 44.23        |
| C6      | CD85j (ILT2)              | 0.34              | 5.3e-130         | 43.32        |
| C6      | CD150 (SLAM)              | 0.36              | 1.2e-119         | 42.36        |
| C6      | Fc $\epsilon$ R1 $\alpha$ | 0.30              | 9.8e-139         | 41.93        |
| C6      | CD354 (TREM-1)            | 0.27              | 1.3e-146         | 39.18        |
| C6      | CD158 (KIR2DL1/S1/S3/S5)  | 0.26              | 5.4e-147         | 38.68        |
| C6      | CD13                      | 0.28              | 4.6e-135         | 37.48        |
| C6      | KLRG1 (MAFA)              | 0.31              | 1.1e-118         | 36.35        |
| C6      | CD195 (CCR5)              | 0.31              | 6.5e-113         | 35.14        |
| C6      | Ig light chain $\kappa$   | 0.29              | 1.0e-117         | 34.49        |
| C6      | CD196 (CCR6)              | 0.32              | 2.0e-107         | 34.34        |
| C6      | CD319 (CRACC)             | 0.27              | 6.6e-117         | 31.72        |
| C6      | CD152 (CTLA-4)            | 0.26              | 5.4e-118         | 30.95        |
| C6      | CD122 (IL-2R $\beta$ )    | 0.30              | 3.3e-101         | 29.85        |
| C7      | CD49f                     | 0.48              | 9.8e-213         | 101.02       |
| C7      | CD127 (IL-7R $\alpha$ )   | 0.39              | 3.0e-183         | 71.50        |
| C7      | CD26                      | 0.29              | 5.8e-108         | 30.76        |
| C8      | CD314 (NKG2D)             | 0.90              | 1.1e-161         | 144.42       |
| C8      | CD244 (2B4)               | 0.58              | 3.6e-114         | 65.60        |
| C8      | CD8                       | 0.59              | 1.6e-110         | 64.44        |
| C8      | CD195 (CCR5)              | 0.47              | 2.9e-82          | 38.15        |
| C8      | CD122 (IL-2R $\beta$ )    | 0.41              | 1.1e-87          | 35.73        |
| C8      | KLRG1 (MAFA)              | 0.39              | 1.1e-55          | 21.51        |
| C8      | CX3CR1                    | 0.45              | 3.1e-31          | 13.79        |
| C8      | CD38                      | 0.26              | 6.1e-40          | 10.39        |
| C8      | GPR56                     | 0.29              | 6.2e-35          | 9.94         |
| C8      | CD24                      | 0.36              | 1.8e-27          | 9.54         |
| C8      | CD223 (LAG-3)             | 0.36              | 6.9e-27          | 9.46         |
| C8      | LOX-1                     | 0.34              | 7.0e-25          | 8.26         |
| C8      | CD79b (Ig $\beta$ )       | 0.34              | 4.7e-24          | 7.85         |
| C8      | CD74                      | 0.36              | 3.0e-22          | 7.82         |
| C8      | IgE                       | 0.31              | 7.8e-26          | 7.68         |
| C8      | CD303 (BDCA-2)            | 0.33              | 1.2e-21          | 6.82         |
| C8      | CD23                      | 0.34              | 3.2e-18          | 5.96         |
| C8      | CD163                     | 0.26              | 3.8e-17          | 4.22         |
| C8      | CD83                      | 0.27              | 2.0e-15          | 4.03         |
| C8      | CD134 (OX40)              | 0.25              | 2.5e-09          | 2.16         |
| C9      | CD1c                      | 1.14              | 1.7e-185         | 210.39       |
| C9      | CD116                     | 1.27              | 2.2e-159         | 200.73       |
| C9      | CD86                      | 1.04              | 7.0e-183         | 188.71       |
| C9      | HLA-DR                    | 1.03              | 2.7e-148         | 151.94       |

(continued)

| Cluster | Marker                                 | log2(fold change) | Adjusted p value | $\pi$ -score |
|---------|----------------------------------------|-------------------|------------------|--------------|
| C9      | CD40                                   | 1.01              | 1.3e-137         | 137.73       |
| C9      | HLA-DR, DP, DQ                         | 1.00              | 7.2e-130         | 129.55       |
| C9      | CD131                                  | 0.84              | 8.8e-151         | 126.05       |
| C9      | CD39                                   | 0.98              | 4.6e-128         | 125.09       |
| C9      | CD54                                   | 0.93              | 1.7e-132         | 121.89       |
| C9      | CD112 (Nectin-2)                       | 0.96              | 6.8e-122         | 116.20       |
| C9      | CD274 (B7-H1, PD-L1)                   | 0.95              | 1.1e-122         | 116.03       |
| C9      | CD58 (LFA-3)                           | 0.72              | 5.2e-112         | 80.62        |
| C9      | CD141 (Thrombomodulin)                 | 0.85              | 1.6e-89          | 75.49        |
| C9      | CD32                                   | 0.87              | 1.5e-85          | 73.78        |
| C9      | CD9                                    | 0.68              | 1.6e-80          | 54.39        |
| C9      | CD83                                   | 0.55              | 7.1e-72          | 39.01        |
| C9      | CD63                                   | 0.55              | 1.7e-68          | 37.55        |
| C9      | CD119 (IFN- $\gamma$ R $\alpha$ chain) | 0.52              | 5.1e-72          | 36.72        |
| C9      | CD155 (PVR)                            | 0.43              | 5.1e-53          | 22.56        |
| C9      | CD304 (Neuropilin-1)                   | 0.40              | 7.7e-57          | 22.40        |
| C9      | CD31                                   | 0.40              | 1.4e-52          | 21.00        |
| C9      | CD85j (ILT2)                           | 0.40              | 1.2e-52          | 20.84        |
| C9      | CD319 (CRACC)                          | 0.37              | 1.3e-54          | 20.17        |
| C9      | CD72                                   | 0.41              | 1.3e-48          | 19.79        |
| C9      | CD267 (TACI)                           | 0.32              | 7.1e-57          | 18.08        |
| C9      | CD13                                   | 0.26              | 1.1e-32          | 8.18         |
| C9      | CD169 (Sialoadhesin, Siglec-1)         | 0.25              | 6.9e-28          | 6.90         |
| C9      | IgE                                    | 0.26              | 3.4e-24          | 6.10         |
| C9      | CD49d                                  | 0.26              | 4.2e-23          | 5.72         |

**Supplemental Table 6:** Significant surface markers enriched in HIV+ versus HIV- cells during chronic infection. Test performed using the DESeq2 pseudobulk method in Seurat (two-tailed with multiple comparison adjustment using Bonferroni-Hochberg method).

| Subset   | Cluster | Marker         | log2(fold change) | Adjusted p value | $\pi$ -score |
|----------|---------|----------------|-------------------|------------------|--------------|
| CD4+     | HIV-    | CD48           | -0.58             | 1.2e-04          | -2.25        |
| CD4+     | HIV-    | CD49f          | -0.91             | 3.0e-02          | -1.39        |
| CD4+     | HIV-    | CD47           | -0.56             | 2.8e-02          | -0.87        |
| CD4+     | HIV+    | CD71           | 1.98              | 9.5e-15          | 27.72        |
| CD4+     | HIV+    | CD278 (ICOS)   | 1.16              | 7.0e-06          | 5.98         |
| CD4+     | HIV+    | HLA-DR         | 0.91              | 6.8e-04          | 2.89         |
| CD4+     | HIV+    | HLA-DR, DP, DQ | 1.04              | 5.0e-03          | 2.39         |
| CD4+     | HIV+    | CD279 (PD-1)   | 1.17              | 3.5e-02          | 1.70         |
| CD4+     | HIV+    | CD151 (PETA-3) | 0.76              | 3.3e-02          | 1.12         |
| Tfh CD4+ | HIV-    | CD69           | -0.79             | 1.9e-02          | -1.36        |
| Tfh CD4+ | HIV-    | CD45           | -0.31             | 1.6e-03          | -0.87        |
| Tfh CD4+ | HIV+    | CD71           | 1.19              | 3.9e-08          | 8.79         |

**Supplemental Table 7:** Significant surface markers enriched in each cluster (over all other cells) during treated infection. Significance calculated in Seurat using two-sided Wilcoxon test with multiple comparison adjustment using Bonferroni-Hochberg method.

| Cluster | Marker                  | log2(fold change) | Adjusted p value | $\pi$ -score |
|---------|-------------------------|-------------------|------------------|--------------|
| C1      | CD71                    | 1.70              | 4.4e-262         | 445.49       |
| C1      | CD31                    | 1.23              | 4.2e-251         | 306.72       |
| C1      | CD38                    | 1.11              | 3.8e-234         | 259.30       |
| C1      | CD112 (Nectin-2)        | 0.99              | 4.8e-248         | 244.33       |
| C1      | HLA-DR                  | 1.03              | 1.0e-190         | 195.96       |
| C1      | CD244 (2B4)             | 0.90              | 4.5e-204         | 182.49       |
| C1      | HLA-DR, DP, DQ          | 0.94              | 9.1e-193         | 179.78       |
| C1      | CD123                   | 0.62              | 8.8e-267         | 165.89       |
| C1      | CD33                    | 0.71              | 8.0e-192         | 135.51       |
| C1      | CD49b                   | 0.67              | 4.9e-157         | 105.12       |
| C1      | CD305 (LAIR1)           | 0.58              | 9.3e-138         | 79.08        |
| C1      | CD200 (OX2)             | 0.59              | 9.2e-124         | 72.53        |
| C1      | CD109                   | 0.44              | 2.9e-81          | 35.20        |
| C1      | CLEC12A                 | 0.43              | 7.3e-71          | 29.85        |
| C1      | GPR56                   | 0.47              | 8.9e-62          | 28.43        |
| C1      | CD151 (PETA-3)          | 0.36              | 1.7e-74          | 26.86        |
| C1      | CD63                    | 0.35              | 1.3e-70          | 24.36        |
| C1      | CD131                   | 0.36              | 1.5e-51          | 18.11        |
| C1      | CD9                     | 0.25              | 1.2e-39          | 9.74         |
| C10     | GPR56                   | 0.49              | 0.0e+00          | Inf          |
| C10     | CD57                    | 0.41              | 0.0e+00          | Inf          |
| C10     | CD244 (2B4)             | 0.34              | 0.0e+00          | Inf          |
| C10     | KLRG1 (MAFA)            | 0.32              | 0.0e+00          | Inf          |
| C11     | CD94                    | 1.21              | 0.0e+00          | Inf          |
| C11     | CD56 (NCAM)             | 1.20              | 0.0e+00          | Inf          |
| C11     | CD16                    | 0.87              | 0.0e+00          | Inf          |
| C11     | CD314 (NKG2D)           | 0.85              | 0.0e+00          | Inf          |
| C11     | CD244 (2B4)             | 0.85              | 0.0e+00          | Inf          |
| C11     | CD11c                   | 0.79              | 0.0e+00          | Inf          |
| C11     | GPR56                   | 0.74              | 0.0e+00          | Inf          |
| C11     | CD9                     | 0.64              | 0.0e+00          | Inf          |
| C11     | NKp80                   | 0.61              | 0.0e+00          | Inf          |
| C11     | CD63                    | 0.59              | 0.0e+00          | Inf          |
| C11     | CD57                    | 0.79              | 1.6e-264         | 207.30       |
| C11     | CD61                    | 0.61              | 2.8e-288         | 176.60       |
| C11     | CD41                    | 0.64              | 8.7e-262         | 166.86       |
| C11     | CD31                    | 0.58              | 6.7e-269         | 154.27       |
| C11     | CD8                     | 0.61              | 5.2e-222         | 134.10       |
| C11     | CD151 (PETA-3)          | 0.42              | 7.3e-231         | 96.01        |
| C11     | CLEC1B (CLEC2)          | 0.47              | 3.2e-194         | 91.55        |
| C11     | CD122 (IL-2R $\beta$ )  | 0.39              | 2.5e-217         | 84.64        |
| C11     | CD328 (Siglec-7)        | 0.48              | 1.1e-169         | 81.74        |
| C11     | CD11b                   | 0.29              | 2.2e-243         | 70.62        |
| C11     | CD32                    | 0.28              | 6.6e-208         | 57.34        |
| C11     | CD38                    | 0.39              | 1.9e-120         | 46.65        |
| C11     | TIGIT (VSTM3)           | 0.34              | 9.6e-137         | 46.63        |
| C11     | HLA-DR                  | 0.29              | 3.6e-119         | 34.06        |
| C11     | CD49b                   | 0.34              | 4.0e-55          | 18.72        |
| C11     | CD158e1 (KIR3DL1, NKB1) | 0.41              | 3.3e-03          | 1.02         |
| C12     | GPR56                   | 0.86              | 0.0e+00          | Inf          |
| C12     | CD57                    | 0.86              | 0.0e+00          | Inf          |
| C12     | KLRG1 (MAFA)            | 0.76              | 0.0e+00          | Inf          |
| C12     | CX3CR1                  | 0.54              | 0.0e+00          | Inf          |
| C12     | CD74                    | 0.45              | 0.0e+00          | Inf          |

(continued)

| Cluster | Marker                      | log2(fold change) | Adjusted p value | $\pi$ -score |
|---------|-----------------------------|-------------------|------------------|--------------|
| C12     | CD122 (IL-2R $\beta$ )      | 0.38              | 0.0e+00          | Inf          |
| C12     | CD244 (2B4)                 | 0.36              | 0.0e+00          | Inf          |
| C12     | CD79b (Ig $\beta$ )         | 0.35              | 0.0e+00          | Inf          |
| C12     | CD23                        | 0.26              | 0.0e+00          | Inf          |
| C13     | GPR56                       | 0.87              | 0.0e+00          | Inf          |
| C13     | KLRG1 (MAFA)                | 0.73              | 0.0e+00          | Inf          |
| C13     | CD57                        | 0.54              | 0.0e+00          | Inf          |
| C13     | CD244 (2B4)                 | 0.50              | 0.0e+00          | Inf          |
| C13     | CD319 (CRACC)               | 0.32              | 0.0e+00          | Inf          |
| C13     | CD195 (CCR5)                | 0.27              | 0.0e+00          | Inf          |
| C15     | CD69                        | 0.48              | 0.0e+00          | Inf          |
| C15     | CD49f                       | 0.28              | 0.0e+00          | Inf          |
| C16     | CD74                        | 0.49              | 0.0e+00          | Inf          |
| C16     | CD79b (Ig $\beta$ )         | 0.38              | 0.0e+00          | Inf          |
| C16     | CD55                        | 0.34              | 0.0e+00          | Inf          |
| C16     | CD62L                       | 0.31              | 0.0e+00          | Inf          |
| C16     | CD23                        | 0.30              | 0.0e+00          | Inf          |
| C16     | CD200 (OX2)                 | 0.30              | 0.0e+00          | Inf          |
| C17     | CD49b                       | 0.34              | 0.0e+00          | Inf          |
| C17     | CD9                         | 0.32              | 0.0e+00          | Inf          |
| C17     | CD62L                       | 0.27              | 0.0e+00          | Inf          |
| C17     | CD61                        | 0.26              | 0.0e+00          | Inf          |
| C17     | CD39                        | 0.26              | 0.0e+00          | Inf          |
| C18     | CD161                       | 0.54              | 0.0e+00          | Inf          |
| C18     | CD26                        | 0.53              | 0.0e+00          | Inf          |
| C18     | CD55                        | 0.46              | 0.0e+00          | Inf          |
| C18     | CD192 (CCR2)                | 0.44              | 0.0e+00          | Inf          |
| C18     | CD49f                       | 0.43              | 0.0e+00          | Inf          |
| C18     | CD73 (Ecto-5'-nucleotidase) | 0.42              | 0.0e+00          | Inf          |
| C18     | CD127 (IL-7R $\alpha$ )     | 0.39              | 0.0e+00          | Inf          |
| C18     | CD27                        | 0.37              | 0.0e+00          | Inf          |
| C18     | CD7                         | 0.36              | 0.0e+00          | Inf          |
| C18     | CD150 (SLAM)                | 0.32              | 0.0e+00          | Inf          |
| C18     | CD49d                       | 0.28              | 0.0e+00          | Inf          |
| C18     | CD69                        | 0.28              | 0.0e+00          | Inf          |
| C18     | CD196 (CCR6)                | 0.26              | 0.0e+00          | Inf          |
| C18     | CD29                        | 0.26              | 0.0e+00          | Inf          |
| C18     | CD35                        | 0.29              | 1.1e-209         | 60.22        |
| C19     | CD25                        | 0.71              | 0.0e+00          | Inf          |
| C19     | CD39                        | 0.61              | 0.0e+00          | Inf          |
| C19     | TIGIT (VSTM3)               | 0.55              | 0.0e+00          | Inf          |
| C19     | CD71                        | 0.53              | 0.0e+00          | Inf          |
| C19     | HLA-DR, DP, DQ              | 0.48              | 0.0e+00          | Inf          |
| C19     | HLA-DR                      | 0.45              | 0.0e+00          | Inf          |
| C19     | CD194 (CCR4)                | 0.43              | 0.0e+00          | Inf          |
| C19     | CD101 (BB27)                | 0.40              | 0.0e+00          | Inf          |
| C19     | CD27                        | 0.34              | 0.0e+00          | Inf          |
| C19     | CD278 (ICOS)                | 0.28              | 0.0e+00          | Inf          |
| C19     | CD95 (Fas)                  | 0.28              | 0.0e+00          | Inf          |
| C2      | CD11c                       | 1.13              | 0.0e+00          | Inf          |
| C2      | CD141 (Thrombomodulin)      | 0.84              | 0.0e+00          | Inf          |
| C2      | CLEC12A                     | 0.80              | 0.0e+00          | Inf          |
| C2      | CD116                       | 0.76              | 0.0e+00          | Inf          |
| C2      | CD328 (Siglec-7)            | 0.55              | 0.0e+00          | Inf          |
| C2      | CD33                        | 0.90              | 1.5e-248         | 222.74       |
| C2      | CD93                        | 0.72              | 1.2e-305         | 218.20       |

(continued)

| Cluster | Marker                  | log2(fold change) | Adjusted p value | $\pi$ -score |
|---------|-------------------------|-------------------|------------------|--------------|
| C2      | HLA-DR                  | 0.88              | 1.8e-178         | 157.02       |
| C2      | CD32                    | 0.58              | 2.8e-247         | 142.85       |
| C2      | CD13                    | 0.45              | 3.0e-266         | 120.17       |
| C2      | CD31                    | 0.67              | 6.4e-153         | 102.63       |
| C2      | CD38                    | 0.45              | 9.6e-200         | 89.01        |
| C2      | CD85j (ILT2)            | 0.41              | 2.1e-203         | 82.12        |
| C2      | FcεR1α                  | 0.56              | 2.1e-143         | 79.49        |
| C2      | CD63                    | 0.49              | 4.2e-159         | 77.35        |
| C2      | HLA-DR, DP, DQ          | 0.80              | 2.1e-95          | 75.54        |
| C2      | CD39                    | 0.47              | 1.1e-155         | 72.74        |
| C2      | CD35                    | 0.48              | 5.6e-128         | 61.31        |
| C2      | IgE                     | 0.47              | 3.9e-128         | 60.26        |
| C2      | CD354 (TREM-1)          | 0.31              | 3.4e-193         | 59.58        |
| C2      | CD49b                   | 0.44              | 1.2e-133         | 58.84        |
| C2      | CD112 (Nectin-2)        | 0.41              | 4.3e-143         | 58.62        |
| C2      | CD14                    | 0.37              | 3.2e-131         | 47.66        |
| C2      | CD9                     | 0.52              | 3.7e-92          | 47.10        |
| C2      | CD61                    | 0.52              | 3.9e-84          | 43.64        |
| C2      | CD41                    | 0.53              | 2.1e-79          | 42.00        |
| C2      | CD88 (C5aR)             | 0.26              | 5.4e-158         | 41.45        |
| C2      | CD74                    | 0.45              | 5.5e-88          | 39.11        |
| C2      | CLEC1B (CLEC2)          | 0.39              | 1.6e-89          | 34.26        |
| C2      | CD163                   | 0.35              | 1.6e-91          | 32.22        |
| C2      | CD83                    | 0.34              | 2.1e-84          | 28.69        |
| C2      | CD62P (P-Selectin)      | 0.32              | 5.3e-89          | 28.19        |
| C2      | CD101 (BB27)            | 0.31              | 9.9e-84          | 26.11        |
| C2      | CD119 (IFN-γ R α chain) | 0.26              | 1.3e-93          | 24.46        |
| C2      | CD200 (OX2)             | 0.32              | 7.8e-70          | 21.80        |
| C2      | LOX-1                   | 0.29              | 4.2e-40          | 11.38        |
| C2      | CD23                    | 0.31              | 1.9e-29          | 9.03         |
| C2      | CD54                    | 0.30              | 1.3e-26          | 7.66         |
| C2      | CD79b (Igβ)             | 0.30              | 3.3e-16          | 4.63         |
| C20     | CD27                    | 0.49              | 0.0e+00          | Inf          |
| C20     | CD7                     | 0.48              | 0.0e+00          | Inf          |
| C20     | integrin β7             | 0.32              | 0.0e+00          | Inf          |
| C21     | CD74                    | 0.52              | 0.0e+00          | Inf          |
| C21     | CD79b (Igβ)             | 0.42              | 0.0e+00          | Inf          |
| C21     | CD23                    | 0.35              | 0.0e+00          | Inf          |
| C21     | CD200 (OX2)             | 0.34              | 0.0e+00          | Inf          |
| C21     | CD163                   | 0.25              | 0.0e+00          | Inf          |
| C21     | LOX-1                   | 0.25              | 3.6e-289         | 73.25        |
| C3      | CD35                    | 1.17              | 0.0e+00          | Inf          |
| C3      | CD32                    | 1.10              | 0.0e+00          | Inf          |
| C3      | HLA-DR, DP, DQ          | 1.07              | 0.0e+00          | Inf          |
| C3      | HLA-DR                  | 1.06              | 0.0e+00          | Inf          |
| C3      | CD31                    | 0.72              | 0.0e+00          | Inf          |
| C3      | CD40                    | 0.61              | 0.0e+00          | Inf          |
| C3      | IgM                     | 0.76              | 3.7e-191         | 145.03       |
| C3      | CD39                    | 0.58              | 1.3e-240         | 139.96       |
| C3      | CD9                     | 0.57              | 4.6e-199         | 112.67       |
| C3      | CD37                    | 0.44              | 3.7e-242         | 106.96       |
| C3      | CD71                    | 0.58              | 1.1e-183         | 105.31       |
| C3      | CD185 (CXCR5)           | 0.46              | 3.8e-208         | 95.11        |
| C3      | CD41                    | 0.59              | 1.1e-158         | 92.74        |
| C3      | CD61                    | 0.54              | 7.8e-143         | 76.61        |
| C3      | CD38                    | 0.42              | 2.0e-146         | 61.55        |

(continued)

| Cluster | Marker                       | log2(fold change) | Adjusted p value | $\pi$ -score |
|---------|------------------------------|-------------------|------------------|--------------|
| C3      | CD73 (Ecto-5'-nucleotidase)  | 0.50              | 2.6e-119         | 59.52        |
| C3      | CD200 (OX2)                  | 0.39              | 2.3e-119         | 45.97        |
| C3      | Ig light chain $\lambda$     | 0.51              | 4.3e-87          | 43.69        |
| C3      | CD63                         | 0.33              | 4.9e-124         | 40.74        |
| C3      | CLEC1B (CLEC2)               | 0.37              | 7.4e-104         | 38.03        |
| C3      | CD275 (B7-H2, B7-RP1, ICOSL) | 0.32              | 9.7e-119         | 37.52        |
| C3      | CD85j (ILT2)                 | 0.30              | 5.3e-122         | 36.69        |
| C3      | Ig light chain $\kappa$      | 0.37              | 7.7e-94          | 34.66        |
| C3      | CD24                         | 0.28              | 8.5e-102         | 28.25        |
| C3      | CD305 (LAIR1)                | 0.32              | 3.3e-85          | 26.66        |
| C3      | CD49b                        | 0.39              | 2.9e-67          | 25.95        |
| C3      | CD74                         | 0.27              | 1.2e-72          | 19.15        |
| C3      | CD11c                        | 0.27              | 5.3e-61          | 16.15        |
| C3      | CD272 (BTLA)                 | 0.27              | 4.2e-57          | 15.11        |
| C3      | CD42b                        | 0.26              | 2.9e-36          | 9.29         |
| C4      | CD11c                        | 1.33              | 0.0e+00          | Inf          |
| C4      | CD33                         | 1.24              | 0.0e+00          | Inf          |
| C4      | CLEC12A                      | 1.12              | 0.0e+00          | Inf          |
| C4      | CD35                         | 1.03              | 0.0e+00          | Inf          |
| C4      | CD31                         | 1.00              | 0.0e+00          | Inf          |
| C4      | HLA-DR                       | 0.97              | 0.0e+00          | Inf          |
| C4      | CD328 (Siglec-7)             | 0.77              | 0.0e+00          | Inf          |
| C4      | CD116                        | 0.75              | 0.0e+00          | Inf          |
| C4      | HLA-DR, DP, DQ               | 0.72              | 0.0e+00          | Inf          |
| C4      | CD63                         | 0.70              | 0.0e+00          | Inf          |
| C4      | CD32                         | 0.64              | 0.0e+00          | Inf          |
| C4      | CD9                          | 0.63              | 0.0e+00          | Inf          |
| C4      | CD141 (Thrombomodulin)       | 0.62              | 0.0e+00          | Inf          |
| C4      | CD11b                        | 0.62              | 0.0e+00          | Inf          |
| C4      | CD41                         | 0.62              | 0.0e+00          | Inf          |
| C4      | CD61                         | 0.60              | 0.0e+00          | Inf          |
| C4      | CD88 (C5aR)                  | 0.58              | 0.0e+00          | Inf          |
| C4      | CD93                         | 0.54              | 0.0e+00          | Inf          |
| C4      | CD38                         | 0.43              | 0.0e+00          | Inf          |
| C4      | CD354 (TREM-1)               | 0.43              | 0.0e+00          | Inf          |
| C4      | CD39                         | 0.42              | 0.0e+00          | Inf          |
| C4      | CD85j (ILT2)                 | 0.41              | 0.0e+00          | Inf          |
| C4      | CD244 (2B4)                  | 0.37              | 0.0e+00          | Inf          |
| C4      | CD13                         | 0.36              | 0.0e+00          | Inf          |
| C4      | CD192 (CCR2)                 | 0.40              | 1.4e-281         | 112.97       |
| C4      | CD14                         | 0.42              | 3.6e-271         | 112.45       |
| C4      | CLEC1B (CLEC2)               | 0.39              | 1.6e-255         | 99.63        |
| C4      | CD101 (BB27)                 | 0.32              | 1.9e-263         | 83.01        |
| C4      | CD62P (P-Selectin)           | 0.31              | 2.5e-164         | 50.18        |
| C4      | CD49b                        | 0.33              | 1.9e-149         | 48.88        |
| C4      | Fc $\epsilon$ R1 $\alpha$    | 0.26              | 2.8e-48          | 12.22        |
| C6      | CD74                         | 0.86              | 0.0e+00          | Inf          |
| C6      | CD79b (Ig $\beta$ )          | 0.82              | 0.0e+00          | Inf          |
| C6      | IgE                          | 0.76              | 0.0e+00          | Inf          |
| C6      | CD23                         | 0.76              | 0.0e+00          | Inf          |
| C6      | CD134 (OX40)                 | 0.70              | 0.0e+00          | Inf          |
| C6      | LOX-1                        | 0.69              | 0.0e+00          | Inf          |
| C6      | CD314 (NKG2D)                | 0.66              | 0.0e+00          | Inf          |
| C6      | CD200 (OX2)                  | 0.64              | 0.0e+00          | Inf          |
| C6      | CD24                         | 0.63              | 0.0e+00          | Inf          |
| C6      | CD83                         | 0.62              | 0.0e+00          | Inf          |

(continued)

| Cluster | Marker                         | log2(fold change) | Adjusted p value | $\pi$ -score |
|---------|--------------------------------|-------------------|------------------|--------------|
| C6      | CD163                          | 0.62              | 0.0e+00          | Inf          |
| C6      | CD45RA                         | 0.60              | 0.0e+00          | Inf          |
| C6      | CX3CR1                         | 0.57              | 0.0e+00          | Inf          |
| C6      | CD93                           | 0.55              | 0.0e+00          | Inf          |
| C6      | CD141 (Thrombomodulin)         | 0.53              | 0.0e+00          | Inf          |
| C6      | CD303 (BDCA-2)                 | 0.52              | 0.0e+00          | Inf          |
| C6      | CD116                          | 0.50              | 0.0e+00          | Inf          |
| C6      | CD112 (Nectin-2)               | 0.50              | 0.0e+00          | Inf          |
| C6      | CD275 (B7-H2, B7-RP1, ICOSL)   | 0.48              | 0.0e+00          | Inf          |
| C6      | CD13                           | 0.46              | 0.0e+00          | Inf          |
| C6      | CD122 (IL-2R $\beta$ )         | 0.45              | 0.0e+00          | Inf          |
| C6      | CD183 (CXCR3)                  | 0.44              | 0.0e+00          | Inf          |
| C6      | CD196 (CCR6)                   | 0.43              | 0.0e+00          | Inf          |
| C6      | Fc $\epsilon$ R1 $\alpha$      | 0.42              | 0.0e+00          | Inf          |
| C6      | CD115 (CSF-1R)                 | 0.42              | 0.0e+00          | Inf          |
| C6      | CD223 (LAG-3)                  | 0.41              | 0.0e+00          | Inf          |
| C6      | Podoplanin                     | 0.40              | 0.0e+00          | Inf          |
| C6      | CD142                          | 0.39              | 0.0e+00          | Inf          |
| C6      | NKp80                          | 0.38              | 0.0e+00          | Inf          |
| C6      | CD158 (KIR2DL1/S1/S3/S5)       | 0.38              | 0.0e+00          | Inf          |
| C6      | CD14                           | 0.37              | 0.0e+00          | Inf          |
| C6      | CD85j (ILT2)                   | 0.37              | 0.0e+00          | Inf          |
| C6      | CD109                          | 0.36              | 0.0e+00          | Inf          |
| C6      | CD169 (Sialoadhesin, Siglec-1) | 0.35              | 0.0e+00          | Inf          |
| C6      | CD195 (CCR5)                   | 0.33              | 0.0e+00          | Inf          |
| C6      | CD152 (CTLA-4)                 | 0.31              | 0.0e+00          | Inf          |
| C6      | CD185 (CXCR5)                  | 0.31              | 0.0e+00          | Inf          |
| C6      | CD354 (TREM-1)                 | 0.30              | 0.0e+00          | Inf          |
| C6      | CD158e1 (KIR3DL1, NKB1)        | 0.29              | 0.0e+00          | Inf          |
| C6      | CD94                           | 0.28              | 0.0e+00          | Inf          |
| C6      | CD137 (4-1BB)                  | 0.28              | 0.0e+00          | Inf          |
| C6      | CD279 (PD-1)                   | 0.28              | 0.0e+00          | Inf          |
| C6      | TIGIT (VSTM3)                  | 0.27              | 0.0e+00          | Inf          |
| C6      | CD38                           | 0.26              | 0.0e+00          | Inf          |
| C6      | CD107a (LAMP-1)                | 0.26              | 0.0e+00          | Inf          |
| C7      | CD83                           | 0.59              | 0.0e+00          | Inf          |
| C7      | CD303 (BDCA-2)                 | 0.56              | 0.0e+00          | Inf          |
| C7      | CD223 (LAG-3)                  | 0.54              | 0.0e+00          | Inf          |
| C7      | CD275 (B7-H2, B7-RP1, ICOSL)   | 0.53              | 0.0e+00          | Inf          |
| C7      | CD24                           | 0.52              | 0.0e+00          | Inf          |
| C7      | NKp80                          | 0.50              | 0.0e+00          | Inf          |
| C7      | CD169 (Sialoadhesin, Siglec-1) | 0.49              | 0.0e+00          | Inf          |
| C7      | CD134 (OX40)                   | 0.49              | 0.0e+00          | Inf          |
| C7      | IgE                            | 0.47              | 0.0e+00          | Inf          |
| C7      | CD23                           | 0.46              | 0.0e+00          | Inf          |
| C7      | CD137 (4-1BB)                  | 0.46              | 0.0e+00          | Inf          |
| C7      | LOX-1                          | 0.44              | 0.0e+00          | Inf          |
| C7      | CD116                          | 0.43              | 0.0e+00          | Inf          |
| C7      | Podoplanin                     | 0.43              | 0.0e+00          | Inf          |
| C7      | CD142                          | 0.42              | 0.0e+00          | Inf          |
| C7      | CD109                          | 0.42              | 0.0e+00          | Inf          |
| C7      | CD112 (Nectin-2)               | 0.42              | 0.0e+00          | Inf          |
| C7      | CD163                          | 0.39              | 0.0e+00          | Inf          |
| C7      | CD115 (CSF-1R)                 | 0.38              | 0.0e+00          | Inf          |
| C7      | CD85j (ILT2)                   | 0.38              | 0.0e+00          | Inf          |
| C7      | CD74                           | 0.37              | 0.0e+00          | Inf          |



(continued)

| Cluster | Marker                                 | log2(fold change) | Adjusted p value | $\pi$ -score |
|---------|----------------------------------------|-------------------|------------------|--------------|
| C7      | CD152 (CTLA-4)                         | 0.36              | 0.0e+00          | Inf          |
| C7      | CD79b (Ig $\beta$ )                    | 0.35              | 0.0e+00          | Inf          |
| C7      | CD200 (OX2)                            | 0.32              | 0.0e+00          | Inf          |
| C7      | CD304 (Neuropilin-1)                   | 0.32              | 0.0e+00          | Inf          |
| C7      | Fc $\epsilon$ R1 $\alpha$              | 0.31              | 0.0e+00          | Inf          |
| C7      | Ig light chain $\kappa$                | 0.31              | 0.0e+00          | Inf          |
| C7      | CD314 (NKG2D)                          | 0.31              | 0.0e+00          | Inf          |
| C7      | CD45RA                                 | 0.30              | 0.0e+00          | Inf          |
| C7      | CX3CR1                                 | 0.29              | 0.0e+00          | Inf          |
| C7      | CD141 (Thrombomodulin)                 | 0.29              | 0.0e+00          | Inf          |
| C7      | CD158e1 (KIR3DL1, NKB1)                | 0.29              | 0.0e+00          | Inf          |
| C7      | CD14                                   | 0.28              | 0.0e+00          | Inf          |
| C7      | TIGIT (VSTM3)                          | 0.28              | 0.0e+00          | Inf          |
| C7      | CD93                                   | 0.27              | 0.0e+00          | Inf          |
| C7      | CD267 (TACI)                           | 0.27              | 0.0e+00          | Inf          |
| C7      | CD37                                   | 0.26              | 0.0e+00          | Inf          |
| C7      | CD158 (KIR2DL1/S1/S3/S5)               | 0.25              | 0.0e+00          | Inf          |
| C8      | CD116                                  | 0.52              | 1.6e-217         | 112.70       |
| C8      | CX3CR1                                 | 0.54              | 3.3e-203         | 110.10       |
| C8      | CD79b (Ig $\beta$ )                    | 0.53              | 4.6e-207         | 110.06       |
| C8      | CD83                                   | 0.50              | 7.5e-178         | 88.54        |
| C8      | CD303 (BDCA-2)                         | 0.44              | 2.5e-165         | 73.24        |
| C8      | CD134 (OX40)                           | 0.42              | 4.1e-172         | 72.71        |
| C8      | IgM                                    | 0.38              | 1.5e-141         | 52.91        |
| C8      | CD23                                   | 0.35              | 1.3e-140         | 48.77        |
| C8      | IgE                                    | 0.33              | 6.7e-136         | 45.07        |
| C8      | CD74                                   | 0.34              | 6.9e-132         | 44.67        |
| C8      | CD183 (CXCR3)                          | 0.33              | 6.1e-132         | 43.07        |
| C8      | CD194 (CCR4)                           | 0.34              | 1.0e-126         | 42.33        |
| C8      | CD24                                   | 0.32              | 7.0e-119         | 37.70        |
| C8      | Ig light chain $\lambda$               | 0.30              | 2.7e-123         | 37.32        |
| C8      | CD141 (Thrombomodulin)                 | 0.29              | 1.5e-126         | 36.31        |
| C8      | LOX-1                                  | 0.29              | 7.2e-114         | 33.31        |
| C8      | CD112 (Nectin-2)                       | 0.28              | 5.4e-105         | 29.68        |
| C8      | CD200 (OX2)                            | 0.29              | 2.4e-102         | 29.08        |
| C8      | CD142                                  | 0.25              | 1.3e-95          | 24.08        |
| C8      | CD195 (CCR5)                           | 0.28              | 1.6e-86          | 23.88        |
| C9      | CD195 (CCR5)                           | 0.83              | 1.6e-167         | 138.19       |
| C9      | CD161                                  | 0.83              | 1.7e-129         | 107.44       |
| C9      | CD94                                   | 0.83              | 7.1e-63          | 51.79        |
| C9      | KLRG1 (MAFA)                           | 0.58              | 2.5e-82          | 47.27        |
| C9      | CD69                                   | 0.53              | 2.8e-66          | 34.69        |
| C9      | CD26                                   | 0.41              | 1.6e-76          | 30.70        |
| C9      | CD314 (NKG2D)                          | 0.45              | 1.9e-68          | 30.41        |
| C9      | CD56 (NCAM)                            | 0.45              | 1.0e-48          | 21.46        |
| C9      | CD119 (IFN- $\gamma$ R $\alpha$ chain) | 0.31              | 4.0e-58          | 18.06        |
| C9      | CD8                                    | 0.48              | 1.1e-31          | 14.72        |
| C9      | CD244 (2B4)                            | 0.32              | 5.6e-41          | 12.79        |
| C9      | CD31                                   | 0.30              | 3.5e-29          | 8.49         |
| C9      | integrin $\beta$ 7                     | 0.25              | 7.5e-31          | 7.59         |
| C9      | CD7                                    | 0.25              | 7.4e-26          | 6.30         |
| C9      | CD41                                   | 0.26              | 5.3e-19          | 4.84         |

**Supplemental Table 8:** Significant surface markers enriched in HIV+ versus HIV- cells during treated infection. Test performed using the DESeq2 pseudobulk method in Seurat (two-tailed with multiple comparison adjustment using Bonferroni-Hochberg method).

| Subset           | Cluster | Marker                      | log2(fold change) | Adjusted p value | $\pi$ -score |
|------------------|---------|-----------------------------|-------------------|------------------|--------------|
| CD4+ (DESeq2)    | HIV-    | CD74                        | -0.86             | 7.6e-15          | -12.14       |
| CD4+ (DESeq2)    | HIV-    | CD41                        | -0.80             | 8.0e-11          | -8.07        |
| CD4+ (DESeq2)    | HIV-    | CD314 (NKG2D)               | -0.61             | 2.2e-08          | -4.67        |
| CD4+ (DESeq2)    | HIV-    | CD158e1 (KIR3DL1, NKB1)     | -0.69             | 3.9e-07          | -4.44        |
| CD4+ (DESeq2)    | HIV-    | CD61                        | -0.60             | 1.3e-07          | -4.13        |
| CD4+ (DESeq2)    | HIV-    | CD8                         | -0.61             | 2.2e-07          | -4.06        |
| CD4+ (DESeq2)    | HIV-    | GPR56                       | -0.67             | 1.5e-06          | -3.90        |
| CD4+ (DESeq2)    | HIV-    | LOX-1                       | -0.50             | 3.8e-07          | -3.19        |
| CD4+ (DESeq2)    | HIV-    | CD305 (LAIR1)               | -0.32             | 1.5e-09          | -2.84        |
| CD4+ (DESeq2)    | HIV-    | CD122 (IL-2R $\beta$ )      | -0.36             | 4.0e-07          | -2.30        |
| CD4+ (DESeq2)    | HIV-    | CD49b                       | -0.49             | 3.3e-05          | -2.21        |
| CD4+ (DESeq2)    | HIV-    | CD56 (NCAM)                 | -0.46             | 4.6e-05          | -2.01        |
| CD4+ (DESeq2)    | HIV-    | CLEC1B (CLEC2)              | -0.44             | 6.2e-05          | -1.84        |
| CD4+ (DESeq2)    | HIV-    | CD163                       | -0.46             | 1.0e-04          | -1.83        |
| CD4+ (DESeq2)    | HIV-    | CD79b (Ig $\beta$ )         | -0.53             | 3.6e-04          | -1.82        |
| CD4+ (DESeq2)    | HIV-    | CD101 (BB27)                | -0.39             | 5.1e-05          | -1.69        |
| CD4+ (DESeq2)    | HIV-    | CD3                         | -0.16             | 2.0e-11          | -1.69        |
| CD4+ (DESeq2)    | HIV-    | CD134 (OX40)                | -0.43             | 4.6e-04          | -1.45        |
| CD4+ (DESeq2)    | HIV-    | CD94                        | -0.45             | 1.1e-03          | -1.34        |
| CD4+ (DESeq2)    | HIV-    | CD31                        | -0.40             | 5.0e-04          | -1.33        |
| CD4+ (DESeq2)    | HIV-    | CD45RA                      | -0.41             | 2.3e-03          | -1.07        |
| CD4+ (DESeq2)    | HIV-    | CD23                        | -0.44             | 7.1e-03          | -0.95        |
| CD4+ (DESeq2)    | HIV-    | CD141 (Thrombomodulin)      | -0.36             | 4.5e-03          | -0.85        |
| CD4+ (DESeq2)    | HIV-    | CD151 (PETA-3)              | -0.22             | 1.8e-04          | -0.83        |
| CD4+ (DESeq2)    | HIV-    | CD62L                       | -0.12             | 2.4e-07          | -0.82        |
| CD4+ (DESeq2)    | HIV-    | CD13                        | -0.31             | 4.3e-03          | -0.74        |
| CD4+ (DESeq2)    | HIV-    | CD35                        | -0.42             | 4.6e-02          | -0.57        |
| CD4+ (DESeq2)    | HIV-    | CD244 (2B4)                 | -0.21             | 6.9e-03          | -0.45        |
| CD4+ (DESeq2)    | HIV-    | CD14                        | -0.27             | 2.5e-02          | -0.43        |
| CD4+ (DESeq2)    | HIV-    | CD62P (P-Selectin)          | -0.12             | 1.4e-02          | -0.23        |
| CD4+ (DESeq2)    | HIV-    | CD82                        | -0.04             | 2.9e-02          | -0.06        |
| CD4+ (DESeq2)    | HIV-    | TCR $\alpha/\beta$          | -0.01             | 2.6e-02          | -0.02        |
| CD4+ (DESeq2)    | HIV+    | CD195 (CCR5)                | 0.63              | 1.0e-04          | 2.51         |
| CD4+ (DESeq2)    | HIV+    | CD279 (PD-1)                | 0.47              | 7.5e-05          | 1.94         |
| CD4+ (DESeq2)    | HIV+    | CD2                         | 0.33              | 1.5e-03          | 0.94         |
| CD4+ (Wilcoxon)  | HIV-    | CD305 (LAIR1)               | -0.15             | 8.6e-05          | -0.60        |
| CD4+ (Wilcoxon)  | HIV+    | CD150 (SLAM)                | 0.17              | 1.9e-09          | 1.51         |
| CD4+ (Wilcoxon)  | HIV+    | CD195 (CCR5)                | 0.23              | 1.0e-05          | 1.13         |
| CD4+ (Wilcoxon)  | HIV+    | CD279 (PD-1)                | 0.17              | 4.3e-07          | 1.07         |
| CD4+ (Wilcoxon)  | HIV+    | CD49d                       | 0.10              | 8.8e-04          | 0.32         |
| CD4+ (Wilcoxon)  | HIV+    | HLA-DR                      | 0.11              | 2.6e-03          | 0.30         |
| CD4+ (Wilcoxon)  | HIV+    | CD192 (CCR2)                | 0.13              | 6.3e-03          | 0.28         |
| CD4+ (Wilcoxon)  | HIV+    | HLA-DR, DP, DQ              | 0.14              | 3.7e-02          | 0.20         |
| Tcm/Ttm (DESeq2) | HIV-    | CD103 (Integrin $\alpha$ E) | -1.04             | 3.6e-03          | -2.55        |
| Tcm/Ttm (DESeq2) | HIV-    | CD74                        | -0.60             | 1.5e-02          | -1.09        |
| Tcm/Ttm (DESeq2) | HIV-    | CD62L                       | -0.23             | 5.4e-04          | -0.75        |
| Tcm/Ttm (DESeq2) | HIV-    | CD55                        | -0.24             | 2.4e-02          | -0.40        |
| Tcm/Ttm (DESeq2) | HIV+    | CD57                        | 1.53              | 6.8e-11          | 15.55        |
| Tcm/Ttm (DESeq2) | HIV+    | CD195 (CCR5)                | 1.03              | 3.0e-07          | 6.71         |
| Tcm/Ttm (DESeq2) | HIV+    | CD2                         | 0.53              | 2.6e-11          | 5.64         |
| Tcm/Ttm (DESeq2) | HIV+    | KLRG1 (MAFA)                | 0.96              | 2.7e-04          | 3.41         |
| Tcm/Ttm (DESeq2) | HIV+    | CD11a                       | 0.47              | 3.0e-06          | 2.60         |
| Tcm/Ttm (DESeq2) | HIV+    | CD279 (PD-1)                | 0.61              | 8.4e-04          | 1.87         |
| Tcm/Ttm (DESeq2) | HIV+    | HLA-DR, DP, DQ              | 0.70              | 1.3e-02          | 1.32         |

(continued)

| Subset           | Cluster | Marker                  | log2(fold change) | Adjusted p value | $\pi$ -score |
|------------------|---------|-------------------------|-------------------|------------------|--------------|
| Tcm/Ttm (DESeq2) | HIV+    | CD18                    | 0.42              | 2.4e-02          | 0.69         |
| Tcm/Ttm (DESeq2) | HIV+    | CD26                    | 0.46              | 3.2e-02          | 0.68         |
| Tcm/Ttm (DESeq2) | HIV+    | CD71                    | 0.49              | 4.4e-02          | 0.67         |
| Tem (DESeq2)     | HIV-    | CD41                    | -1.47             | 5.6e-07          | -9.21        |
| Tem (DESeq2)     | HIV-    | CD305 (LAIR1)           | -0.78             | 1.4e-07          | -5.36        |
| Tem (DESeq2)     | HIV-    | CD101 (BB27)            | -1.10             | 3.1e-05          | -4.97        |
| Tem (DESeq2)     | HIV-    | CD61                    | -1.13             | 7.8e-05          | -4.65        |
| Tem (DESeq2)     | HIV-    | CD3                     | -0.50             | 2.9e-08          | -3.78        |
| Tem (DESeq2)     | HIV-    | GPR56                   | -0.86             | 4.1e-05          | -3.76        |
| Tem (DESeq2)     | HIV-    | CD56 (NCAM)             | -0.98             | 2.2e-03          | -2.60        |
| Tem (DESeq2)     | HIV-    | CD71                    | -0.90             | 2.1e-03          | -2.41        |
| Tem (DESeq2)     | HIV-    | CD122 (IL-2R $\beta$ )  | -0.73             | 6.2e-04          | -2.36        |
| Tem (DESeq2)     | HIV-    | CD200 (OX2)             | -1.08             | 7.9e-03          | -2.27        |
| Tem (DESeq2)     | HIV-    | CD8                     | -1.04             | 8.6e-03          | -2.15        |
| Tem (DESeq2)     | HIV-    | CD158e1 (KIR3DL1, NKB1) | -1.21             | 2.0e-02          | -2.06        |
| Tem (DESeq2)     | HIV-    | CD38                    | -0.78             | 6.0e-03          | -1.74        |
| Tem (DESeq2)     | HIV-    | CLEC1B (CLEC2)          | -0.81             | 1.0e-02          | -1.62        |
| Tem (DESeq2)     | HIV-    | CD151 (PETA-3)          | -0.56             | 1.3e-03          | -1.61        |
| Tem (DESeq2)     | HIV-    | LOX-1                   | -0.84             | 2.3e-02          | -1.37        |
| Tem (DESeq2)     | HIV-    | CD314 (NKG2D)           | -0.88             | 2.9e-02          | -1.36        |
| Tem (DESeq2)     | HIV-    | CD93                    | -0.61             | 2.6e-02          | -0.97        |
| Tem (DESeq2)     | HIV-    | CD5                     | -0.27             | 7.7e-04          | -0.83        |
| Tem (DESeq2)     | HIV-    | CD244 (2B4)             | -0.34             | 3.4e-02          | -0.50        |
| Tem (DESeq2)     | HIV+    | CD279 (PD-1)            | 0.58              | 7.1e-06          | 2.98         |
| Tem (DESeq2)     | HIV+    | CD195 (CCR5)            | 0.59              | 2.1e-02          | 0.99         |

**Supplemental Table 9:** Autologous or consensus virus sequences used in study.

| Individual | Fasta Prefix or Name | Location                      | Publication              |
|------------|----------------------|-------------------------------|--------------------------|
| A08        | chrA08               | GenBank; Supplementary File 1 | Gondim et al., 2021      |
| A09        | chrA09               | GenBank; Supplementary File 1 | Gondim et al., 2021      |
| A01        | chrA01.              | Supplementary File 1          | This paper               |
| B45        | chrBEAT2045_         | Supplementary File 1          | This paper               |
| C01        | HXB2                 | GenBank (K03455.1)            | Ratner et al., 1985      |
| C02        | HXB2                 | GenBank (K03455.1)            | Ratner et al., 1985      |
| ND492      | SUMA_TF1             | GenBank (JN944928.1)          | Ochsenbauer et al., 2012 |
